# Supplementary material
Source: Research Square preprint supplement (doi:10.21203/rs.3.rs-10104926/v1)
Supplement: Supplementary file 1 [file 3f90ec8c25fdfe8cb4874063.docx]

**Unidentified fluorine and TFA dominate the fluorine mass balance in European drinking water**

Zongzhe He1,2,#,*, Xing Chen1,#, Bénilde Bonnefille3, Jonathan Zweigle4, Merle Plassmann2, Anna Roos5, Mohammad Sadia6, Håkon Austad Langberg7, Rita Binetti8, Tony Venelinov9, Martin Cornelsen10, Juan Luis Santos11, Andreas Marius Kaiser12, Dzintars Zacs13, Adrian de la Torre14, Mélanie Ourgaud15, Dvorakova Darina16, Alexander Haluska17, Hanna Joerss18, Paweł Struciński19, Daniel Zahn20, Stoimir Kolarevic21, Roesch Philipp22, Rosie Williams23, Marco Parolini24, Mingliang Fang1,*, Ian T. Cousins2,*, Jonathan P. Benskin2,*

1Department of Environmental Science and Engineering, Fudan University, Shanghai, 200438, China

2Department of Environmental Science, Contaminant Chemistry Unit, Stockholm University, 10691 Stockholm, Sweden

3Department of Environmental Science, Exposure and Effects Unit, Science for Life Laboratory, Stockholm University, Stockholm 10691, Sweden

4Analytical Chemistry Group, Department of Plant and Environmental Science, Faculty of Science, University of Copenhagen, Thorvaldsensvej 40, 1871, Frederiksberg C, Denmark

5Greenland Institute of Natural Resources, Kivioq 2, PO Box 570, 3900, Nuuk, Greenland

6Department of Natural Science, Design and Sustainable Development (NDH), Mid Sweden University, SE-85170, Sundsvall, Sweden

7Akvaplan niva AS, Havnegata 9, Trondheim 7010, Norway

8SMAT Research Centre Laboratories, Corso Unità d’Italia 235/3 10127, Torino, Italy

9Faculty of Hydraulic Engineering, University of Architecture, Civil Engineering and Geodesy, 1046, Sofia, Bulgaria

10Cornelsen Umwelttechnologie GmbH, Graf-Beust-Allee 33, D-45141, Essen, Germany

11Departamento de Química Analítica, Escuela Politécnica Superior, Universidad de Sevilla, E–41011, Seville, Spain

12Environment Agency Austria, Spittelauer Lände 5, A-1090, Vienna, Austria

13Institute of Food Safety, Animal Health and Environment “BIOR”, Lejupes iela 3, Riga, LV-1076, Latvia

14Unit of POPs and Emerging Pollutants in the Environment, CIEMAT, Madrid, Spain

15University Perpignan Via Domitia, CNRS, CEFREM, UMR 5110, Perpignan, France

16University of Chemistry and Technology (UCT), Prague, Faculty of Food and Biochemical Technology, Department of Food Analysis and Nutrition, Technicka 5, 166 28, Prague, Czech Republic

17Department of Geosciences, University of Tübingen, Schnarrenbergstraße 94-96, 72076, Tübingen, Germany

18Department of Organic Environmental Chemistry, Helmholtz-Zentrum Hereon, Geesthacht, 21502, Germany

19Department of Food Safety and Health Risk Assessment, National Institute of Public Health NIH – National Research Institute, Chocimska 24, 00-791, Warsaw, Poland

20Helmholtz Centre for Environmental Research - UFZ, Permoserstrasse 15, 04318, Leipzig, Germany

21Institute for Biological Research “Siniša Stanković” - National Institute of the Republic of Serbia, University of Belgrade, Bulevar despota Stefana 142, 11060, Belgrade, Serbia

22German Environment Agency, Waste Water Analysis and Monitoring Methods, Schichauweg 58, 12307, Berlin, Germany

23Institute of Zoology, Zoological Society of London, Regent’s Park, London NW1 4RY, U.K.

24University of Milan, Department of Environmental Science and Policy, via Celoria 26, I-20133, Milan, Italy

#Z.H. and X.C. contributed equally to this work.

*To whom correspondence may be addressed. Email: [hezz@fudan.edu.cn](mailto:hezz@fudan.edu.cn), [mlfang@fudan.edu.cn](mailto:mlfang@fudan.edu.cn), [Ian.Cousins@aces.su.se](mailto:Ian.Cousins@aces.su.se), or [Jon.Benskin@aces.su.se](mailto:Jon.Benskin@aces.su.se)

| Number of Pages | 21 |
| --- | --- |
| Number of Tables | 12 |
| Number of Figures | 7 |

**Supporting Information Text**

**Text 1.** **Sampling protocol provided to participants**

**Sampling Strategy**

To address drinking water project objectives, please follow these criteria:

- The sampling sites should be located in the municipal area of the cities;
- Avoid collecting samples from some special purpose faucets such as laboratory;
- Ensure that the water samples come from the flowing faucet rather than from the water storage tank.
- During sampling, the person collecting the sample should not wear any clothing containing Teflon polymers (Gore-Tex or similar) or that have been treated with stain or water repellants.

**Sampling Procedure**

For each sample, we need 500 mL of water contained in the PP bottle. Before sampling, please rinse bottles with methanol and Milli-Q water. After that, rinse bottles with tap water twice (The rinsing step includes the inside of the caps). After the sample is collected, field blanks consisted of 5 mL and 500 mL Milli-Q water subjected to the same collection methods as the drinking water samples.

Label the bottle clearly with a sample name and complete the sampling information below:

| Cities | Longitude  /Latitude | Sampling time | The corresponding water treatment plant | Vicinal PFAS sources |
| --- | --- | --- | --- | --- |
|  |  |  |  |  |

For sample storage and shipping, please keep samples always at room temperature and we hope you ship the samples as soon as you get them. Moreover, no preservatives or pH adjustments should be made to the samples.

**Text 2. Sample extraction and instrumental analysis**

**Sample extraction**

Each 0.5 L tap-water sample was acidified to pH 4 using acetic acid and loaded onto Oasis WAX cartridges (150 mg, 6 mL; Waters), preconditioned with 4 mL 0.3% NH₄OH in methanol and 4 mL 0.1 M acetic acid. After sample loading, the PP bottles were rinsed with 10 mL methanol, which was combined with the residual sample and reloaded onto the cartridge.

Cartridges were washed sequentially with 5 mL 20:80 methanol/0.1 M acetic acid and 20 mL 0.01% NH₄OH in Milli-Q water. Elution was performed with 10 mL 0.3% NH₄OH in Milli-Q water (fraction I) and 3 mL 0.3% NH₄OH in methanol (fraction II). Both fractions were evaporated to dryness under nitrogen (60 °C for fraction I, 30 °C for fraction II) and reconstituted in 300 µL methanol/water (50:50, v/v).

A 60 µL aliquot was spiked with 40 µL isotopically labeled internal standards for UHPLC–MS/MS quantification, and the remaining extract was used for extractable fluorine (EF) measurement.

**Instrumental analysis**

***Target analysis.*** Targeted analysis was performed on a Thermo ultra-high performance liquid chromatograph coupled to a Thermo TSQ Quantiva triple quadrupole mass spectrometer (UHPLC-MS/MS) equipped with an electrospray ionization (ESI) source. Since short- and ultra-short chain PFAAs tend to be poorly retained on reversed phase columns, two separate chromatographic methods were employed: the first utilized Thermo Fisher Scientific Acclaim Trinity P1 anion exchange analytical and guard columns (2.1 × 100 mm, 3 µm and 2.1 × 10 mm, 3 µm, respectively) for analysis of trifluoroacetic acid (TFA), perfluoropropanoic acid (PFPrA), perfluorobutanoic acid (PFBA), perfluoropentanoic acid (PFPeA), trifluoromethane sulfonic acid (TFMS), pentafluoroethanesulfonic acid (PFEtS), perfluoropropane sulfonic acid (PFPrS), perfluoropentane sulfonic acid (PFPeS), BF4-, and PF6-. The second method utilized Waters C18 BEH analytical and guard columns (2.1 mm × 50 mm, 1.7 μm, and 2.1 mm × 5 mm, 1.7 μm, respectively) for longer chain length PFAS.

UHPLC-high-resolution mass spectrometry (HRMS) analyses were performed using a Thermo Vanquish Flex UHPLC system coupled to an Orbitrap Exploris 240 mass spectrometer operated in negative data-dependent acquisition (ddMS2) mode. Chromatographic separation was conducted at 40 °C with a flow rate of 0.3 mL min-1 using a Waters Acquity BEH C18 column (2.1 × 100 mm, 1.7 µm) with mobile phase A consisting of 95/5 (v/v) water/methanol + 2 mM ammonium acetate and B consisting of 95/5 (v/v) methanol/water + 2 mM ammonium acetate. The gradient started at 10% B for 1 minute followed by a linear increase to 99% B (1 - 12 min) which was kept until 15 min. At 15.1 min, the composition was returned to initial conditions until 17 min. The MS source parameters were a capillary voltage of 2500 V and sheath-, aux-, and sweep gas of 30, 10, and 1 Arb units. Ion transfer and vaporizer temperature have been kept at 200 and 300 °C, respectively.

***Extractable fluorine analysis.*** EF was determined in individual extracts using a Thermo-Mitsubishi combustion ion chromatograph (CIC). In brief, 100 μL of sample extract was placed on a quartz boat and combusted at 1100 °C for 5 min. Combustion gases were absorbed into MilliQ water and then a portion of this solution was injected onto the IC for determination of fluoride by conductivity detection.

**Text 3. QA/QC**

For EF analysis, the procedural blank (7.7±0.6 ng F L-1) and the boat blank (8.2±0.3 ng F L-1) were not significantly different (n=3). Samples were therefore blank-corrected on a batch-specific basis using the average procedural blank for the batch plus three times its standard deviation. Boat blanks were inserted between samples to check for and avoid carry-over in the CIC system. External quantification was performed using a seven-point sodium fluoride standard calibration curve ranging from 50 to 10,000 ng F mL-1 to quantify the EF in water samples (*r*2 = 0.9997). A QC sample spiked by perfluorooctane sulfonic acid (PFOS) was inserted into each batch to ensure the accuracy of the analytical calibration.

Method of EF and PFAS measurement has been validated in our previous study1. Milli-Q water blanks were used to correct background levels during sampling and laboratory analysis. Each sample batch included quality control injections: one procedural blank (Milli-Q water), one matrix blank (local tap water), and one spiked QC (local tap water + 10 ng PFAS + 5000 ng TFA + 5000 ng BF4- and PF6-).

UHPLC-HRMS analysis was used due to the challenging nature of hexafluoropropylene oxide dimer acid (HFPO-DA) analysis. This compound presents analytical challenges, including strong in-source fragmentation and low molecular ion yields2. In Turin samples, UHPLC-HRMS resolved isobaric interferences previously misattributed to HFPO-DA by triple quadrupole MS, illustrating how reliance on a single analytical technique can generate false positives and underscoring the need to integrate complementary approaches for PFAS analysis.

**Text 4: Temporal and replicate variability of PFAS and EF measurements**

Tap water samples collected from the same tap one year apart in Stockholm were performed to verify the temporal stability of PFAS and EF measurements, only substances detectable in at least one sample were considered. The EF value was 159 ng L-1 in 2023 and 174 ng L-1 in 2024, demonstrating excellent agreement with relative differences < 10% (Supplementary Table 5). Most PFAS, including TFA, PFPrA, PFBA, perfluorohexanoic acid (PFHxA), perfluorobutane sulfonic acid (PFBS), perfluorohexane sulfonic acid (PFHxS), and PFOS, also exhibited high reproducibility with relative standard deviations (RSD) < 5%. Several low-concentration PFAS (< 1 ng L-1), including perfluoroheptanoic acid (PFHpA), perfluorooctanoic acid (PFOA), TFMS, and PFPeS, showed RSD between 10% and 23%, consistent with expected variability near their quantification limits. For the inorganic fluorinated anions BF4- and PF6-, which have higher LOQs (1.73 and 1.73 ng L-1, respectively) than target PFAS, variations remained within the 10-fold LOQ threshold commonly accepted for trace-level analytes, despite BF4- showing a 4.3-fold difference between years.

Triplicate samples were collected from the same tap on the same day in Berlin and Marseille (Supplementary Table 1). In Berlin, detectable PFAS exhibited relative differences ranging from 0.8% to 29.7%, with EF showing 15.5% variability. In Marseille, most PFAS displayed RSD ranging from 2.7% to 26.9%; PFOS showed higher RSD with 38%, attributable to its concentration near the LOQ. EF measurements in Marseille also demonstrated good reproducibility (15.4% RSD).

These results meet the performance criteria established in the DWD provisions on monitoring PFAS. All target PFAS except TFA achieved LOQ values around 0.1 ng L-11, fulfilling the optimal conditions for PFAS detection limits3. Furthermore, temporal and replicate RSD for both EF and target PFAS remained below the 39% threshold specified for SPE-based methods, confirming compliance with regulatory analytical requirements.

**Text 5: Recovery correction for PFAS Total evaluation**

Given that fluoride removal during extraction caused substantial losses of ultrashort-chain PFAS (approximately half), recovery correction was applied using analyte-specific recovery determined from QC samples to obtain recovery-corrected PFAS concentrations for each city (Supplementary Table 11). Sum of PFAS concentrations were calculated using 17 of the 20 PFAS listed in the EU Drinking Water Directive (EU) 2020/2184 (PFUnDS, PFDoDS and PFTrDS) were not included due to analytical constraints.

To align our results with PFAS Total, PFAS Total was evaluated by summing individual target PFAS concentrations (i.e., ∑38PFAS) with UEF (expressed as PFOA-equivalents). The conversion of UEF in ng F L-1 to PFOA mass equivalents (ng L-1) is required because the Directive expresses PFAS Total in mass units rather than fluorine units, and PFOA is used as the reference compound for unidentified species captured by fluorine-based measurements3. Importantly, because PFAS differ markedly in toxicological potency, PFAS Total does not necessarily reflect health risk, a point further evaluated through the potency‑weighted risk assessment presented later.

**Text 6: Correlation between fluorinated compounds in European tap water**

Pairwise correlations among 25 detected PFAS and two inorganic fluorinated anions (BF4- and PF6-) were evaluated using nonparametric Spearman’s rank correlation. Correlation coefficients (*r*) were calculated for all valid compound pairs based on concentration data from 41 European tap water samples. Compounds with insufficient detections were excluded to ensure statistical reliability. Two-tailed *p* values were used to assess significance, with thresholds of *p* < 0.05 (*), *p* < 0.01 (**), and *p* < 0.001 (***). The resulting correlation matrix was visualized as a heatmap, color-coded according to *r* and corresponding *p* values, generated using R (version 4.5.1).

Among C3–C8 PFCAs, strong positive correlations were observed among PFPeA, PFHxA, PFHpA and PFOA (*r* = 0.84–0.92, *p* < 0.001), although the PFPeA–PFOA correlation was noticeably weaker (*r* = 0.65). PFBA and PFPrA showed weaker correlations with this PFCA core group (*r* = 0.39–0.72), consistent with more variable sources and higher environmental mobility. Within the PFSA class (C4–C8), PFBS, PFPeS, PFHxS, and PFOS formed a tightly linked group (*r* = 0.70–0.93), with one comparatively weaker pairwise association between PFBS and PFOS (*r* = 0.5). PFHpS exhibited a single significant association with PFOS (*r* = 0.77), likely influenced by lower detection frequency and narrow concentration ranges (Supplementary Fig.6).

Cross-class correlations were widespread: PFHxA, PFHpA, and PFOA strongly correlated with PFBS, PFPeS, PFHxS, and PFOS (*r* = 0.56–0.86, *p* < 0.01), indicating partially overlapping emission sources and similar environmental transport or treatment behaviors. In contrast, TFA showed negligible relationships with all PFAS (|*r*| ≤ 0.3), consistent with its atmospheric origin and secondary formation pathway. The inorganic fluorine (IF) anions BF4- and PF6- showed no correlation with each other (*r* = 0.12, *p* > 0.5) or with other fluorinated compounds, reinforcing their distinct industrial origins4. Notably, the unidentified extractable fluorine (UEF) fraction displayed moderate positive correlations with several short-chain PFCAs (*r* = 0.33–0.58), whereas associations with PFSAs, TFA, and IF were weak or absent. This pattern indicates that UEF is not randomly distributed across sites but preferentially co-varies with PFCA-enriched compositional profiles in European tap water.

Overall, the clustering and correlation analyses revealed two dominant and partially interconnected PFAS co-occurrence regimes in European tap water: a highly mobile PFCA-dominated system and a PFSA-linked system associated with legacy industrial inputs, superimposed with localized contributions from inorganic fluorinated species.

**Figures**


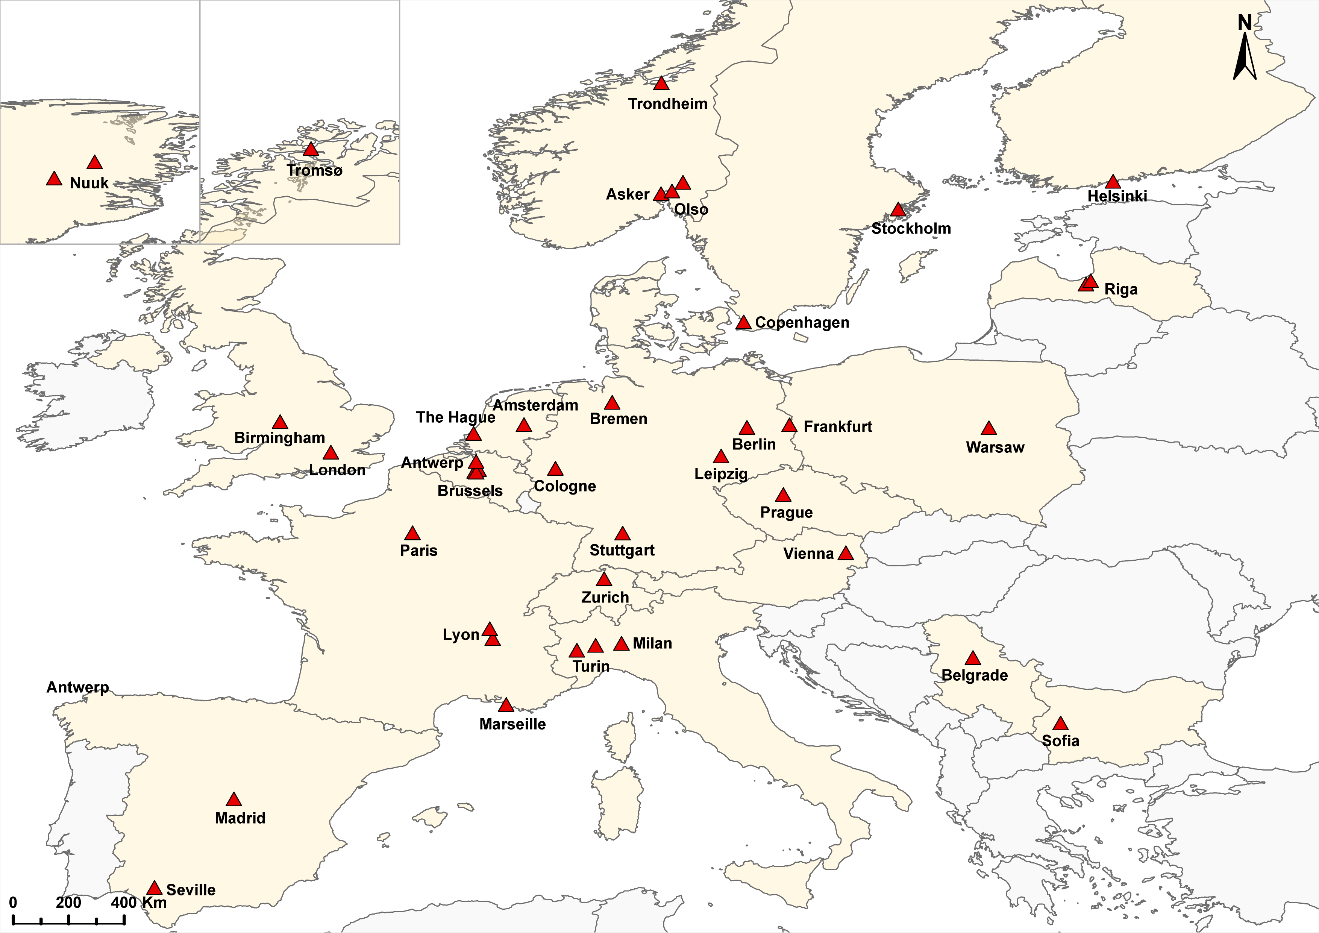


**Fig.1 | Geographic distribution of tap-water sampling sites across Europe.** A total of 41 tap-water samples were collected from 34 cities in 18 European countries. Each triangle denotes a sampling city based on its latitude and longitude coordinates, with most cities represented by a single sampling site while several cities (e.g., Turin and Brussels) were sampled at multiple locations. Two inset maps in the upper-left corner display the geographically distant sampling locations for clarity.


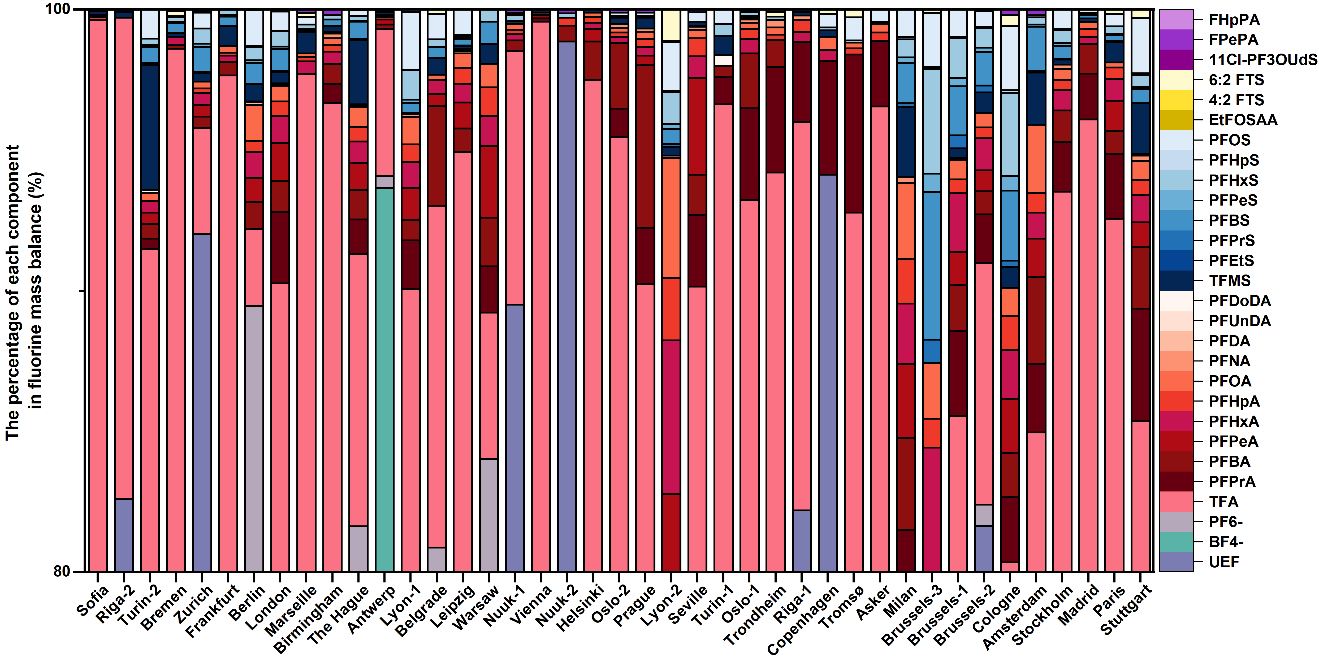
**Fig.2 | Compositional breakdown of the upper 80–100% fluorine fraction in European tap-water samples.** Stacked bar plots illustrate the detailed distribution of identified PFAS classes, UEF, and inorganic fluorine (BF4- and PF6-) across 41 sampling locations. Bars are normalized to 100% on a fluorine-equivalent basis, and the display focuses on the upper 20% segment (80–100%) to highlight minor constituent differences that are less visible in Figure 2A.


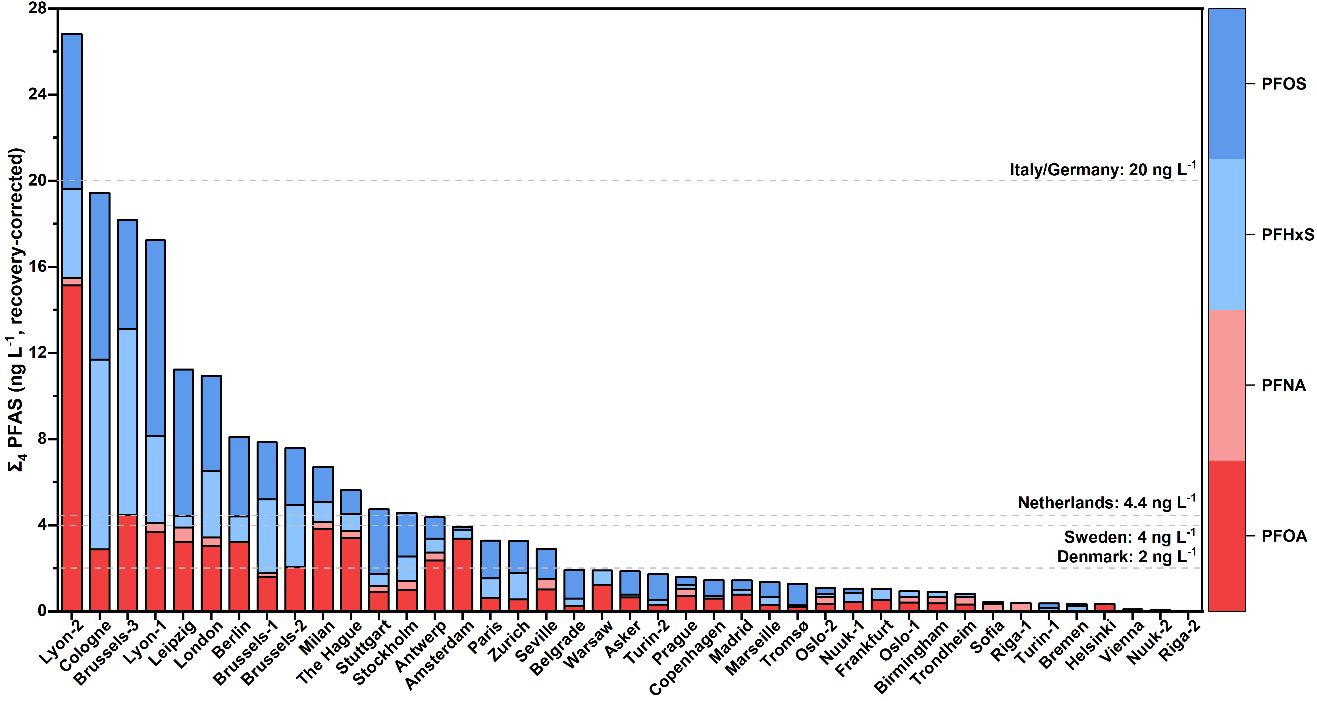
 **Fig.3 | Concentrations of Σ4PFAS in European tap water relative to national guideline values with recovery correction.** Bar chart showing the summed concentrations of four regulated PFAS (Σ4PFAS: PFOA, PFNA, PFHxS, and PFOS; ng L-1) across the 41 tap-water sampling sites, ordered from highest to lowest Σ4 PFAS. Stacked bars indicate the individual contributions of each compound to Σ4PFAS. Horizontal dashed lines denote national guideline values for Σ4 PFAS in drinking water: Denmark (2 ng L-1), Sweden (4 ng L-1), Netherlands (4.4 ng L-1), and Italy/Germany (20 ng L-1; scheduled to take effect in 2026 and 2028, respectively).


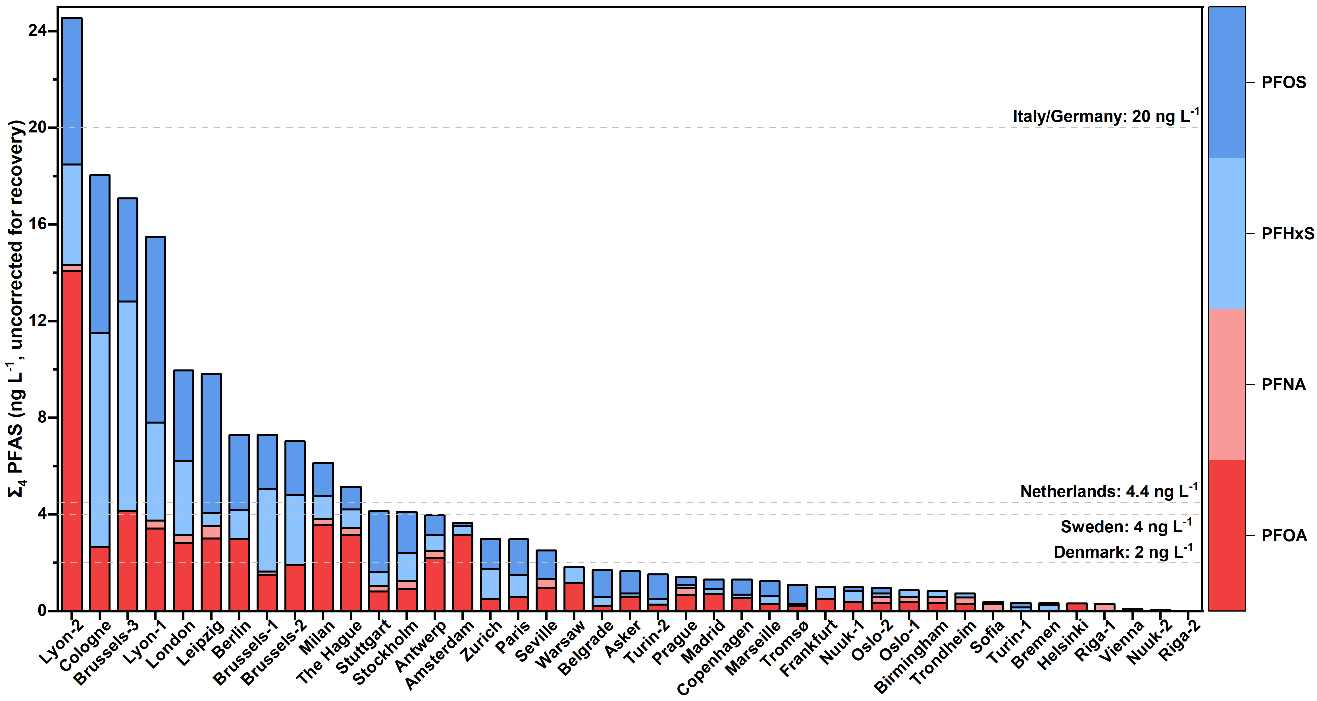


**Fig.4 | Concentrations of Σ4PFAS in European tap water relative to national guideline values without recovery correction**. Bar chart showing the summed concentrations of four regulated PFAS (Σ4PFAS: PFOA, PFNA, PFHxS, and PFOS; ng L-1) across the 41 tap-water sampling sites, ordered from highest to lowest Σ4 PFAS. Stacked bars indicate the individual contributions of each compound to Σ4PFAS. Horizontal dashed lines denote national guideline values for Σ4 PFAS in drinking water: Denmark (2 ng L-1), Sweden (4 ng L-1), Netherlands (4.4 ng L-1), and Italy/Germany (20 ng L-1; scheduled to take effect in 2026 and 2028, respectively).


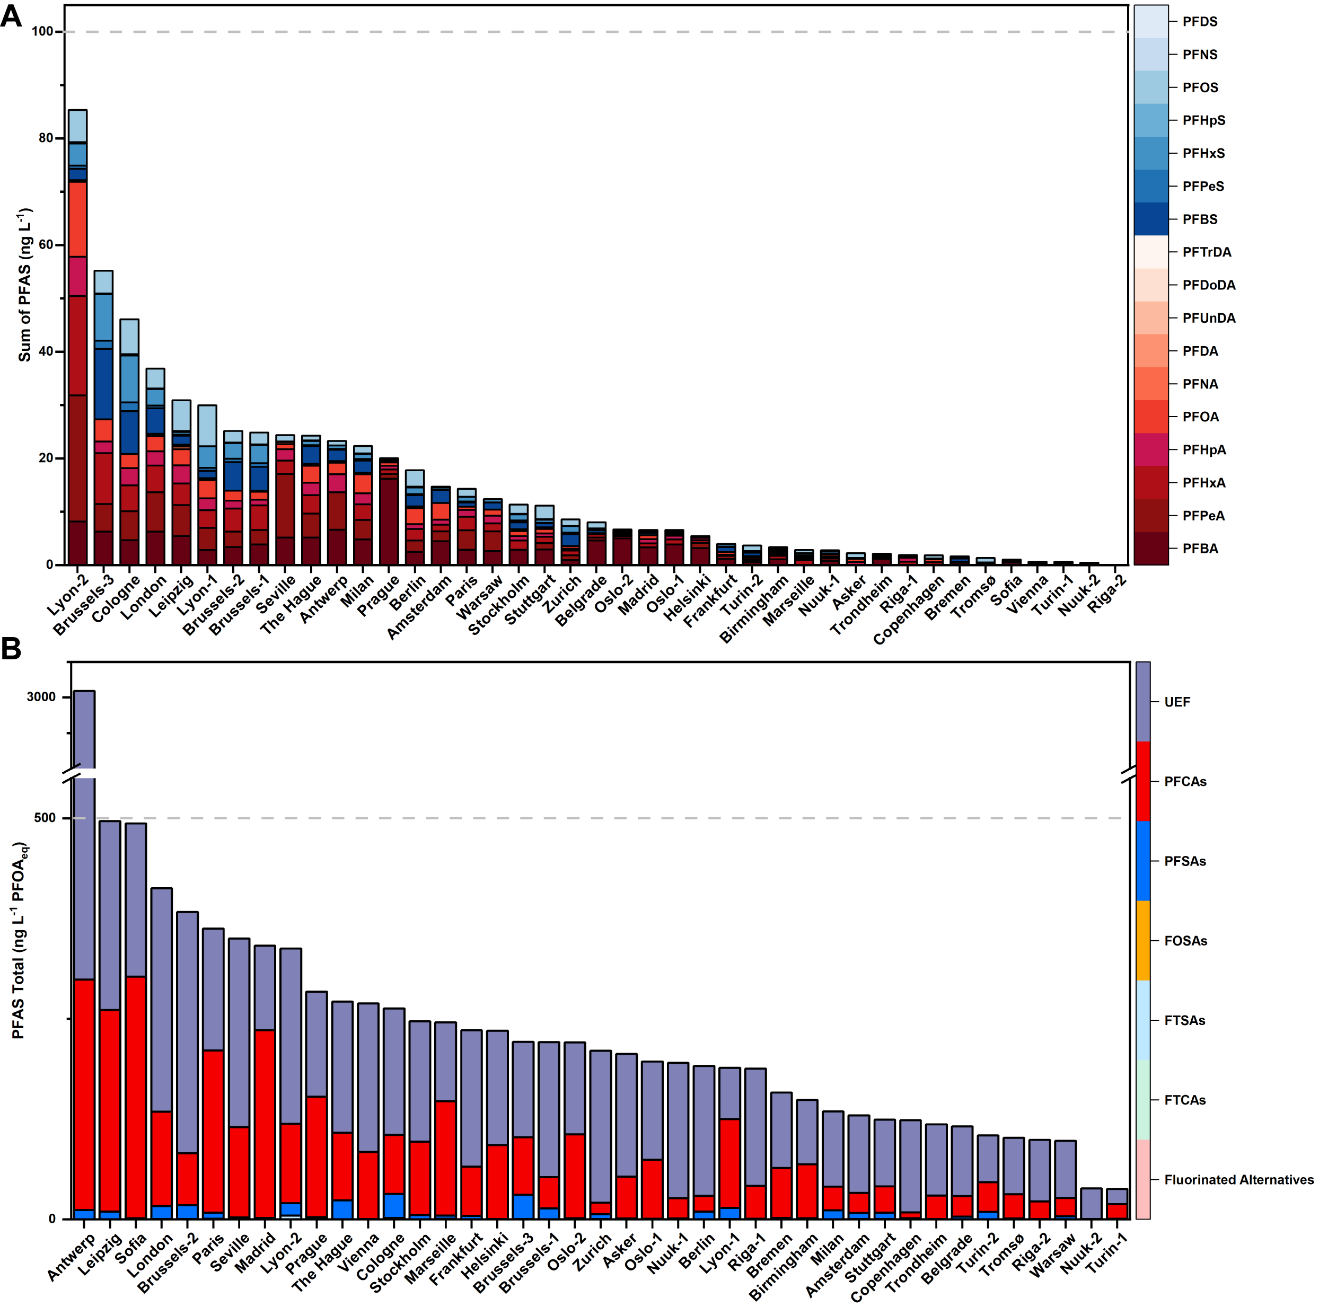


**Fig.5 | Concentration-based regulatory metrics of PFAS in European tap water without recovery correction.** Stacked bar plots show city-level PFAS concentrations under two concentration-based regulatory metrics: (A) Sum of PFAS calculated based on 17 of the 20 PFAS listed in the EU Drinking Water Directive 2020/2184 (PFUnDS, PFDoDS, and PFTrDS were not included due to analytical constraints); and (B) PFAS Total. Colors denote different chemical classes (PFCAs, PFSAs, FOSAs, FTSs, FTCAs, and fluorinated alternatives). Horizontal dashed lines indicate the EU reference levels of 100 ng L-1 (Sum of PFAS) and 500 ng L-1 PFOAeq (PFAS TotalPFOAeq). No recovery correction was applied to the quantified concentrations.


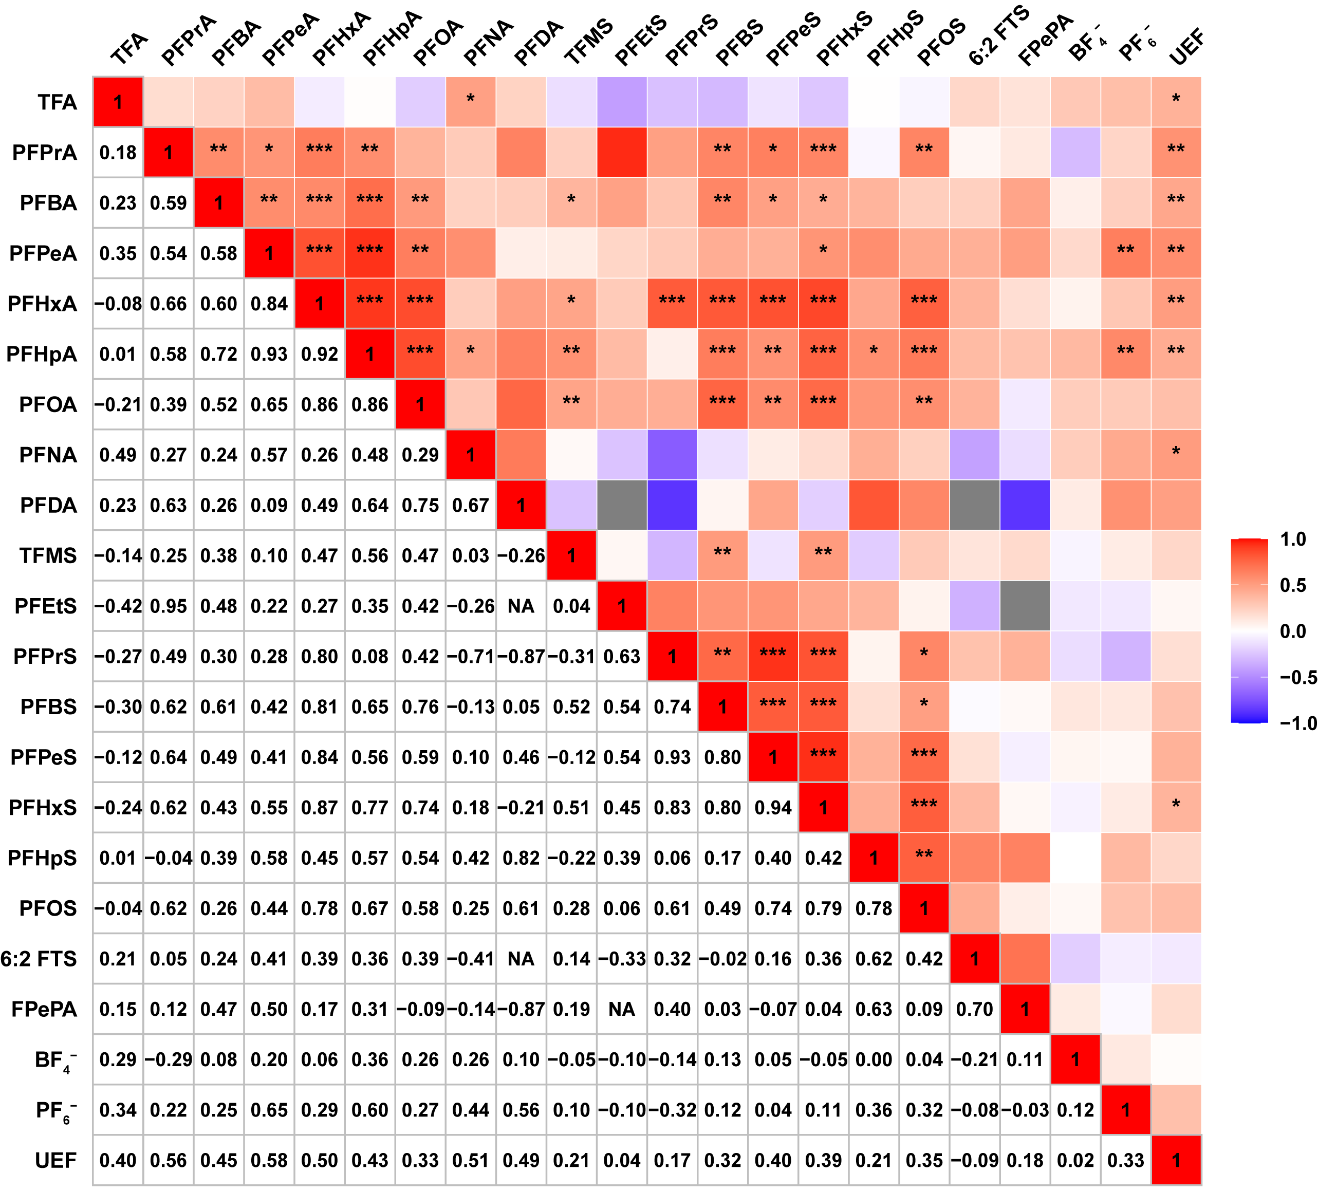
 **Fig.6 | Pairwise Spearman correlations among target PFAS across all sampling sites.** The lower triangle reports correlation coefficients (*r*), with the diagonal fixed to 1. The upper triangle displays a heatmap (red, positive; blue, negative), with the color bar scaled from −1 to 1. Asterisks denote significance levels in the upper triangle: *p* < 0.05 (*), *p* < 0.01 (**), *p* < 0.001 (***).

**
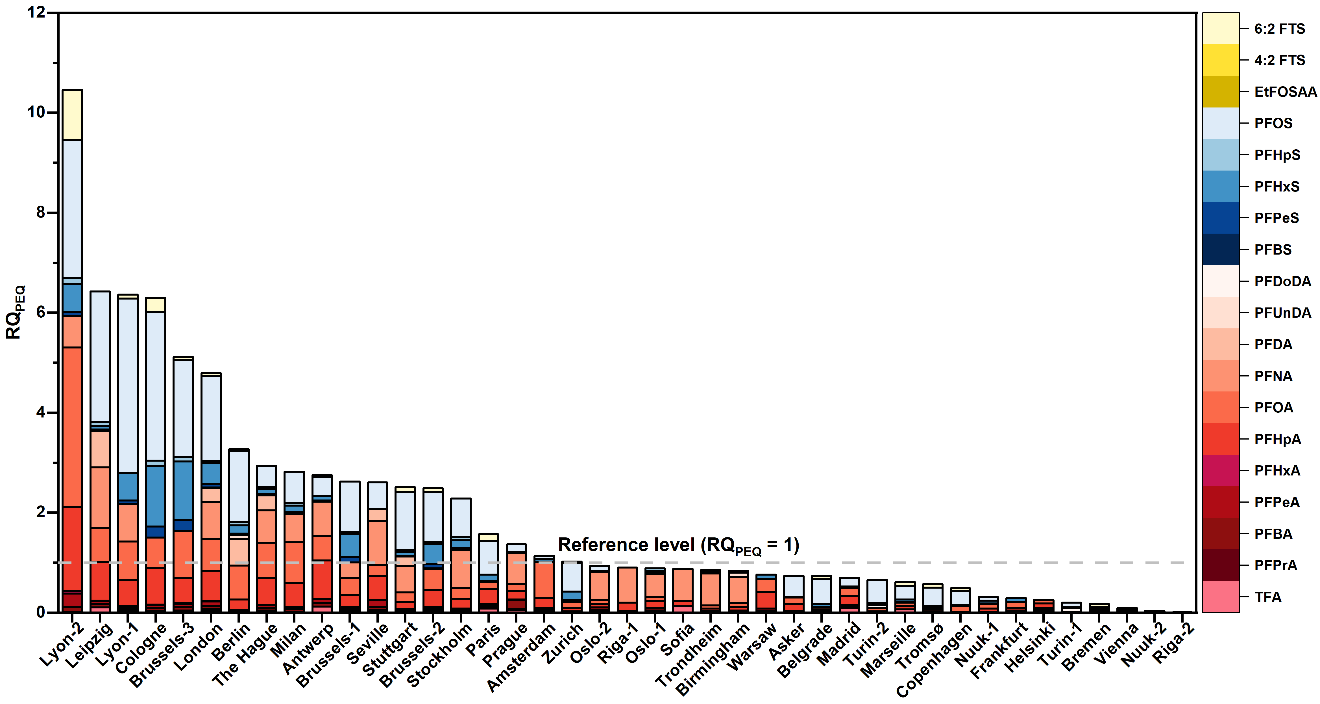
**

**Fig.7 | RQpeq of PFAS mixtures in European tap water without recovery correction.** Stacked bars display the site-specific RQpeq values across 41 European tap water samples, arranged in descending order. Each bar segment represents the proportional contribution of individual PFAS to the total PFOA-equivalent burden. The dashed horizontal line denotes the health-based reference level (RQpeq = 1). Colors correspond to PFAS chemical classes as indicated in the legend. No recovery correction was applied to the quantified concentration.

**Tables**

**Table 2. The MRM parameters of individual PFAS and two inorganic fluorinated anions for LC-MS/MS analysis.**

| **Analytes** | **Abbreviation** | | **Quantification ions** | **Qualification ions** | **Column** | **Isotope-labelled standard** | **Quantification ions** |
| --- | --- | --- | --- | --- | --- | --- | --- |
| **Trifluoroacetic acid** | **TFA** | | 113>69 | 113>82 | Trinity | 13C TFA | 114>69 |
| **Perfluoropropanoic acid** | **PFPrA** | | 163>119 | 163>69 | Trinity | MPFBA | 217>172 |
| **Perfluorobutanoic acid** | **PFBA** | | 213>169 | 213>69 | Trinity | MPFBA | 217>172 |
| **Perfluoropentanoic acid** | **PFPeA** | | 263>219 | 263>169 | Trinity | M5PFPeA | 268>223 |
| **Perfluorohexanoic acid** | **PFHxA** | | 313>269 | 313>119 | C18 | MPFHxA | 315>270 |
| **Perfluoroheptanoic acid** | **PFHpA** | | 363>319 | 363>169 | C18 | M4PFHpA | 367>322 |
| **Perfluorooctanoic acid** | **PFOA** | | 413>369 | 413>169 | C18 | MPFOA | 417>372 |
| **Perfluorononanoic acid** | **PFNA** | | 463>419 | 463>169 | C18 | MPFNA | 468>423 |
| **Perfluorodecanoic acid** | **PFDA** | | 513>469 | 513>169 | C18 | MPFDA | 515>470 |
| **Perfluoroundecanoic acid** | **PFUnDA** | | 563>519 | 563>169 | C18 | MPFUnDA | 565>520 |
| **Perfluorododecanoic acid** | **PFDoDA** | | 613>569 | 613>169 | C18 | MPFDoDA | 615>570 |
| **Perfluorotridecanoic acid** | **PFTrDA** | | 663>619 | 663>169 | C18 | MPFDoDA | 615>570 |
| **Perfluorotetradecanoic acid** | **PFTeDA** | | 713>669 | 713>169 | C18 | MPFDoDA | 615>570 |
| **Perfluoropentadecanoic acid** | **PFPeDAa** | | 763>719 | 763>169 | C18 | MPFDoDA | 615>570 |
| **Trifluoromethane sulfonic acid** | **TFMS** | | 149>80 | 149>99 | Trinity | M3PFBS | 302>80 |
| **Pentafluoroethanesulfonic acid** | **PFEtSa** | | 199>80 | 199>99 | Trinity | M3PFBS | 302>80 |
| **Perfluoropropane sulfonic acid** | **PFPrS** | | 249>80 | 249>99 | Trinity | M3PFBS | 302>80 |
| **Perfluorobutane sulfonic acid** | **PFBS** | | 299>80 | 299>99 | C18 | M3PFBS | 302>80 |
| **Perfluoropentane sulfonic acid** | **PFPeS** | | 349>80 | 349>99 | Trinity | M3PFBS | 302>80 |
| **Perfluorohexane sulfonic acid** | **PFHxS** | | 399>80 | 399>99 | C18 | MPFHxS | 403>84 |
| **Perfluoroheptane sulfonic acid** | **PFHpS** | | 449>80 | 449>99 | C18 | MPFOS | 503>80 |
| **Perfluorooctane sulfonic acid** | **PFOS** | | 499>80 | 499>99 | C18 | MPFOS | 503>80 |
| **Perfluorononane sulfonic acid** | **PFNSa** | | 549>80 | 549>99 | C18 | PFOS | 499>80 |
| **Perfluorodecane sulfonic acid** | **PFDS** | | 599>80 | 599>99 | C18 | MPFOS | 507>80 |
| **4:2 Fluorotelomer sulfonic acid** | | **4:2 FTS** | 327>307 | 327>80 | C18 | M2-6:2 FTS | 429>409 |
| **6:2 Fluorotelomer sulfonic acid** | | **6:2 FTS** | 427>407 | 427>80 | C18 | M2-6:2 FTS | 429>409 |
| **8:2 Fluorotelomer sulfonic acid** | | **8:2 FTS** | 527>507 | 527>80 | C18 | M2-6:2 FTS | 429>409 |
| **Hexafluoropropylene oxide dimer acid** | | **HFPO-DA** | 285>169 b | 285>185 b | C18 | M3HFPO-DA | 287>169 b |
| **4,8-Dioxa-3H-perfluorononanoic acid** | | **NaDONA** | 377>85 | 377>251 | C18 | MPFOA | 417>372 |
| **Perfluoro(2-((6-chlorohexyl)oxy)ethanesulfonic acid)** | | **9Cl-PF3ONS** | 531>351 | 531>219 | C18 | MPFOS | 503>80 |
| **11-chloroeicosafluoro-3-oxaundecane-1-sulfonic acid** | | **11Cl-PF3OUdS** | 631>451 | 631>562 | C18 | MPFOS | 503>80 |
| **3-perfluoropropyl propanoic acid** | | **FPrPA** | 241>177 | 241>117 | C18 | MPFHxA | 315>270 |
| **3-perfluoropentyl propanoic acid** | | **FPePA** | 341>217 | 341>237 | C18 | MPFOA | 417>372 |
| **3-perfluoroheptyl propanoic acid** | | **FHpPA** | 441>317 | 441>337 | C18 | MPFDA | 515>470 |
| **Perfluorooctanesulfonamide** | | **FOSA** | 498>78 | 498>478 | C18 | MFOSA | 506>78 |
| **Perfluorooctane sulfonamidoacetic acid** | | **FOSAA** | 556>498 | 556>419 | C18 | MFOSA | 506>78 |
| **N-ethylperfluoro-1-octanesulfonamidoacetic acid** | | **N-EtFOSAA** | 584>419 | 584>526 | C18 | D3-N-MeFOSA | 515>219 |
| **N-methylperfluoro-1-octanesulfonamidoacetic acid** | | **N-MeFOSAA** | 570>419 | 570>512 | C18 | D3-N-MeFOSAA | 573>419 |
| **Tetrafluoroborate** | | **BF4-** | 87 |  | Trinity | 13C TFA | 114>69 |
| **Hexafluorophosphate** | | **PF6-** | 145 |  | Trinity | 13C TFA | 114>69 |

a no analytical standard was available for this substance; therefore, it was recorded and quantified using the response of the closest homologue.

b the in-source fragment was used for analysis.

**Table 3. Limits of quantification (LOQs) for target substances in the present work, based on the lowest calibration standard.**

| **Compounds** | **LOQ (ng L-1)** | **Compounds** | **LOQ (ng L-1)** |
| --- | --- | --- | --- |
| **TFA** | 0.653 | **PFOS** | 0.106 |
| **PFPrA** | 0.061 | **PFDS** | 0.066 |
| **PFBA** | 0.068 | **FOSAA** | 0.061 |
| **PFPeA** | 0.068 | **FOSA** | 0.062 |
| **PFHxA** | 0.068 | **MeFOSAA** | 0.061 |
| **PFHpA** | 0.068 | **EtFOSAA** | 0.061 |
| **PFOA** | 0.068 | **4:2 FTS** | 0.061 |
| **PFNA** | 0.068 | **6:2 FTS** | 0.199 |
| **PFDA** | 0.068 | **8:2 FTS** | 0.061 |
| **PFUnDA** | 0.068 | **9Cl-PF3ONS** | 0.062 |
| **PFDoDA** | 0.068 | **11Cl-PF3OUdS** | 0.062 |
| **PFTrDA** | 0.068 | **NaDONA** | 0.121 |
| **PFTeDA** | 0.068 | **FPrPA** | 0.061 |
| **TFMS** | 0.060 | **FPePA** | 0.061 |
| **PFPrS** | 0.061 | **FHpPA** | 0.062 |
| **PFBS** | 0.142 | **HFPO-DA** | 0.062 |
| **PFPeS** | 0.061 | **BF4-** | 1.725 |
| **PFHxS** | 0.066 | **PF6-** | 1.726 |
| **PFHpS** | 0.066 |  |  |

**References**

1. He, Z., Plassmann, M., Cousins, I.T. & Benskin, J.P. A novel fluorine mass balance method for improved characterization and quantification of extractable (Organo)fluorine in drinking water. *Environ. Sci. Technol. Lett.* **12**, 73-78 (2025).

2. Strynar, M.*, et al.* Identification of Novel Perfluoroalkyl Ether Carboxylic Acids (PFECAs) and Sulfonic Acids (PFESAs) in Natural Waters Using Accurate Mass Time-of-Flight Mass Spectrometry (TOFMS). *Environ. Sci. Technol.* **49**, 11622-11630 (2015).

3. European Commission. Technical guidelines regarding methods of analysis for monitoring of per- and polyfluoroalkyl substances (PFAS) in water intended for human consumption (C/2024/4910). (Official Journal of the European Union, Brussels, Belgium, 2024).

4. Rensmo, A.*, et al.* Lithium-ion battery recycling: a source of per- and polyfluoroalkyl substances (PFAS) to the environment? *Environ. Sci.: Processes Impacts* **25**, 1015-1030 (2023).
