# Supplementary material
Source: Research Square preprint supplement (doi:10.21203/rs.3.rs-10104926/v1)
Supplement: Supplementary file 2 [file 636974a6bcd4545946675d95.xlsx]

## Sheet: Table 1
Table 1. Sampling site information and geographic coordinates of European tap-water samples.
Sample ID	Sample name	Sample information	Country	City	Sampling site ID	Latitude	Longitude	The corresponding drinking water treatment plant (DWTP)	Reported population for each DWTP	Population of cities	DWTP number in cities	Estimated population for each DWTP
1	The Hague	kitchen	Netherlands	Hague	NL01	52.0698	4.32425	Dunea	1400000
2	Amsterdam	kitchen	Netherlands	Amsterdam	NL02	52.3546	5.95575	/		2480000	2	1240000
3	Milan	kitchen	Italy	Milan	IT01	45.2751	9.11222	/		3260000	2	1630000
4	Stuttgart	kitchen	Germany	Stuttgart	DE01	48.8428	9.1487	bodensee-wasserversorgung	/	5300000	2	2650000
5	Birmingham	kitchen	United Kingdom	Birmingham	GB01	52.45	-1.93689	/		4300000	4	1075000
6	Warsaw	kitchen	Poland	Warsaw	PL01	52.2527	21.0039	/		3100000	3	1033333
7	Belgrade	kitchen	Serbia	Belgrade	RS01	44.8174	20.4871	/		1700000	3	566666
8	Prague	kitchen	Czech Republic	Prague	CZ01	50.0939	14.3499	Želivka	990000
9	Leipzig	kitchen	Germany	Leipzig	DE02	51.3376	12.3352	Probstheida	820000
10	Berlin	kitchen	Germany	Berlin	DE03	52.2633	13.1714	Berliner Wasserbetriebe	/	6200000	9	688888
11	Stockholm	kitchen	Sweden	Stockholm	SE01	59.3294	18.0687	/		2400000	2	1200000
12	Bremen	kitchen	Germany	Bremen	DE04	53.076	8.81037	/		2500000	1	2500000
13	Lyon-1	airport	France	Lyon	FR01	45.7163	5.07747	4.88244		1410000	1	1410000
14	Lyon-2	kitchen	France	Lyon	FR02	45.7022	4.88244	/
15	Riga-1	kitchen	Latvia	Riga	LV01	56.8992	24.1457	Baltezers	/	620000	2	310000
16	Riga-2	kitchen	Latvia	Riga	LV02	57.0073	24.2994	Rigas udens	/	620000	2	310000
17	Madrid	kitchen	Spain	Madrid	ES01	40.2422	-3.4324	/		6700000	13	515384
18	Helsinki	kitchen	Finland	Helsinki	FI01	60.2282	25.0212	HSY Vanhakaupunki	860000
19	Trondheim	kitchen	Norway	Trondheim	NO01	63.4143	10.4044	Jonsvatnet	316888
20	Asker	kitchen	Norway	Asker	NO02	59.8262	10.3911	Holsfjorden	80000
21	Oslo-1	kitchen	Norway	Oslo	NO03	59.9127	10.7461	Maridalsvannet	590000
22	Oslo-2	airport	Norway	Oslo	NO04	60.1939	11.1004	/
23	Brussels-1	airport	Belgium	Brussels	BE01	50.9014	4.48444	/		2500000	1	2500000
24	Brussels-2	kitchen	Belgium	Brussels	BE02	50.8404	4.35969	/
25	Brussels-3	kitchen	Belgium	Brussels	BE03	50.8129	4.41073	/
26	Tromsø	kitchen	Norway	Tromsø	NO05	69.6489	18.9551	/		78745	1	78745
27	Zurich	kitchen	Switzerland	Zurich	CH01	47.3667	8.55	/		430000	3	143333
28	Copenhagen	kitchen	Denmark	Copenhagen	DK01	55.6759	13.0655	/		2050000	7	292857
29	Cologne	kitchen	Germany	Cologne	DE05	50.9405	6.9744	GEW Cologne	/	3600000	8	450000
30	Seville	kitchen	Spain	Seville	ES02	37.3763	-6.00271	ETAP EI Caranbolo	/	1500000	1	1500000
31	Frankfurt	kitchen	Germany	Frankfurt	DE06	52.3471	14.5506	Hessenwusser	2400000
32	Vienna	kitchen	Austria	Vienna	AT01	48.2085	16.3721	City of Vienna	/	2900000	4	725000
33	London	kitchen	United Kingdom	London	GB02	51.4629	-0.2945	/		14000000	4	3500000
34	Paris	kitchen	France	Paris	FR03	48.8534	2.3488	/		12990000	7	1855714
35	Antwerp	kitchen	Belgium	Antwerp	BE04	51.1596	4.40694	/		1200000	2	600000
36	Turin-1	kitchen	Italy	Turin	IT02	45.2093	8.2747	Volpiano a sub-water supply zone of Turin		15141	1	15141
37	Turin-2	kitchen	Italy	Turin	IT03	45.0512	7.66799	Turin water supply zone		2185742	7	312248
38	Sofia	kitchen	Bulgaria	Sofia	BG01	42.6975	23.3241	/		1670000	1	1670000
39	Nuuk-1	airport	Greenland (Denmark)	Greenland	GL01	76	-30	/		20000	1	20000
40	Nuuk-2	kitchen	Greenland (Denmark)	Greenland	GL02	74	-35	/
41	Marseille	kitchen	France	Marseille	FR04	43.297	5.38107	/		1870000	2	935000

## Sheet: Table 4
Table 4. Concentrations of individual PFAS (ng L-1) in European tap water.
Sample name	TFA	PFPrA	PFBA	PFPeA	PFHxA	PFHpA	PFOA	PFNA	PFDA	PFUnDA	PFDoDA	PFTrDA	PFTeDA	PFPeDA	TFMS	PFEtS	PFPrS	PFBS	PFPeS	PFHxS	PFHpS	PFOS	PFNS	PFDS	FOSAA	FOSA	MeFOSAA	EtFOSAA	4:2 FTS	6:2 FTS	8:2 FTS	9Cl-PF3ONS	11Cl-PF3OUdS	DONA	HFPO-DA	FPrPA	FPePA	FHpPA	BF4-	PF6-	∑PFAS	sum targets
PFAS category	PFCA	PFCA	PFCA	PFCA	PFCA	PFCA	PFCA	PFCA	PFCA	PFCA	PFCA	PFCA	PFCA	PFCA	PFSA	PFSA	PFSA	PFSA	PFSA	PFSA	PFSA	PFSA	PFSA	PFSA	FOSA	FOSA	FOSA	FOSA	FTSA	FTSA	FTSA	fluorinated alternatives	fluorinated alternatives	fluorinated alternatives	fluorinated alternatives	FTCA	FTCA	FTCA	inorganic fluorine	inorganic fluorine
The Hague	58.578	6.3985	5.13526	4.53043	3.46054	2.32281	3.1437	0.283921	0.131673	n.d.	n.d.	n.d.	n.d.	n.d.	18.2476	n.d.	0.163253	3.30588	0.159172	0.78181	0.0746917	0.938173	n.d.	n.d.	n.d.	n.d.	n.d.	n.d.	n.d.	n.d.	n.d.	n.d.	n.d.	<LOQ	n.d.	n.d.	0.139903	n.d.	135.165	22.4165	107.795	265.377
Amsterdam	9.41303	3.77326	4.45632	1.87827	1.23855	0.913508	3.13959	n.d.	n.d.	n.d.	n.d.	n.d.	n.d.	n.d.	4.42008	n.d.	0.0979519	2.47737	0.102033	0.374446	<LOQ	0.131673	n.d.	n.d.	n.d.	n.d.	n.d.	n.d.	n.d.	n.d.	n.d.	n.d.	<LOQ	<LOQ	n.d.	n.d.	0.275691	n.d.	3.62881	1.99751	32.6918	38.3181
Milan	8.29104	4.0613	4.78139	3.65578	2.92562	2.1081	3.56752	0.251002	n.d.	<LOQ	n.d.	n.d.	n.d.	n.d.	5.90568	n.d.	0.236717	2.29371	0.285693	0.938173	0.122127	1.37434	n.d.	n.d.	n.d.	n.d.	n.d.	n.d.	n.d.	n.d.	n.d.	n.d.	<LOQ	n.d.	n.d.	n.d.	n.d.	n.d.	n.d.	3.38023	40.7982	44.1784
Stuttgart	19.7385	5.75659	2.92973	1.1447	1.21798	0.655852	0.814729	0.234543	0.0822958	<LOQ	n.d.	n.d.	n.d.	n.d.	3.9344	n.d.	n.d.	0.755046	0.0857079	0.567841	0.0932906	2.53471	n.d.	n.d.	n.d.	n.d.	n.d.	n.d.	<LOQ	0.448439	n.d.	n.d.	<LOQ	n.d.	n.d.	n.d.	n.d.	n.d.	2.29492	2.59233	40.9944	45.8816
Birmingham	63.1426	1.15214	1.09865	n.d.	0.621334	0.320118	0.341528	0.230428	n.d.	0.0929202	n.d.	n.d.	n.d.	n.d.	0.518329	n.d.	n.d.	0.371401	n.d.	0.259232	n.d.	n.d.	n.d.	n.d.	n.d.	n.d.	n.d.	n.d.	n.d.	<LOQ	n.d.	n.d.	n.d.	n.d.	n.d.	n.d.	0.304495	n.d.	6.40092	<LOQ	68.4532	74.8541
Warsaw	9.78929	2.66639	2.62112	3.72027	1.48133	1.42882	1.15214	n.d.	n.d.	<LOQ	n.d.	n.d.	n.d.	n.d.	1.74273	n.d.	n.d.	1.32643	n.d.	0.654252	n.d.	n.d.	n.d.	n.d.	n.d.	n.d.	n.d.	n.d.	n.d.	n.d.	n.d.	n.d.	n.d.	n.d.	n.d.	n.d.	n.d.	n.d.	22.6096	13.3456	26.5828	62.538
Belgrade	19.5628	<LOQ	4.59211	0.548166	0.604874	n.d.	0.222199	n.d.	n.d.	n.d.	<LOQ	n.d.	n.d.	n.d.	1.24889	0.0108727	n.d.	0.55098	n.d.	0.349757	n.d.	1.12745	n.d.	n.d.	n.d.	n.d.	n.d.	n.d.	n.d.	0.231951	<LOQ	n.d.	n.d.	n.d.	n.d.	n.d.	n.d.	n.d.	3.90403	2.97185	29.05	35.9259
Prague	124.731	5.97056	16.1547	0.931076	0.802384	0.710506	0.666596	0.271576	n.d.	n.d.	n.d.	n.d.	n.d.	n.d.	1.78762	n.d.	n.d.	n.d.	n.d.	0.156362	n.d.	0.325069	n.d.	n.d.	n.d.	n.d.	n.d.	n.d.	n.d.	n.d.	n.d.	n.d.	n.d.	<LOQ	n.d.	n.d.	0.312724	n.d.	n.d.	5.07368	152.82	157.893
Leipzig	228.785	n.d.	5.4233	5.80814	4.04896	3.4237	3.0038	0.530808	0.320954	n.d.	n.d.	n.d.	n.d.	n.d.	1.26113	0.00782799	0.126521	1.66518	0.199985	0.522579	0.17457	5.74425	n.d.	n.d.	n.d.	n.d.	n.d.	n.d.	n.d.	n.d.	n.d.	n.d.	n.d.	n.d.	n.d.	n.d.	n.d.	n.d.	69.2715	62.0272	261.047	392.346
Berlin	8.71348	n.d.	2.47573	2.09996	2.20416	0.9057	2.97637	n.d.	0.236601	0.0768232	n.d.	n.d.	n.d.	n.d.	2.57532	0.0205699	n.d.	2.12229	0.224473	1.20152	0.142462	3.1149	n.d.	n.d.	n.d.	<LOQ	n.d.	0.0871669	n.d.	<LOQ	<LOQ	n.d.	<LOQ	n.d.	n.d.	n.d.	n.d.	n.d.	2.23056	37.9061	29.1775	69.3142
Stockholm	79.9815	4.78962	2.88035	n.d.	1.70352	0.866662	0.921713	0.337413	n.d.	n.d.	n.d.	n.d.	n.d.	n.d.	0.759127	0.00611383	n.d.	1.30603	0.326506	1.13157	0.115704	1.71175	n.d.	n.d.	n.d.	n.d.	n.d.	n.d.	n.d.	<LOQ	n.d.	n.d.	<LOQ	n.d.	n.d.	n.d.	n.d.	n.d.	3.9351	2.01527	96.8376	102.788
Bremen	61.7322	n.d.	0.193395	n.d.	0.407364	n.d.	n.d.	n.d.	n.d.	<LOQ	n.d.	n.d.	n.d.	n.d.	0.346913	n.d.	n.d.	0.624443	0.0775453	0.242773	<LOQ	0.0864106	n.d.	n.d.	n.d.	n.d.	n.d.	n.d.	n.d.	0.293805	n.d.	n.d.	<LOQ	n.d.	n.d.	n.d.	0.078181	n.d.	n.d.	n.d.	64.083	64.083
Lyon-1	87.2835	7.1227	2.80217	4.1717	3.30418	2.22521	3.41939	0.329183	n.d.	<LOQ	n.d.	n.d.	n.d.	n.d.	n.d.	n.d.	0.208148	1.41214	0.530573	4.05718	n.d.	7.66997	n.d.	n.d.	n.d.	n.d.	n.d.	n.d.	n.d.	0.340195	n.d.	n.d.	n.d.	<LOQ	n.d.	n.d.	n.d.	n.d.	140.27	6.24999	124.876	271.396
Lyon-2	20.6442	6.14338	8.15963	23.6679	18.5824	7.40957	14.0561	0.275691	n.d.	<LOQ	n.d.	n.d.	n.d.	n.d.	1.80395	n.d.	0.493841	2.12637	0.608118	4.1436	0.247455	6.0652	n.d.	n.d.	n.d.	n.d.	n.d.	<LOQ	0.0989659	4.44728	<LOQ	n.d.	n.d.	n.d.	n.d.	n.d.	n.d.	n.d.	3.18936	<LOQ	118.974	122.163
Riga-1	33.5697	5.99114	n.d.	n.d.	0.625448	0.757353	n.d.	0.308609	n.d.	n.d.	n.d.	n.d.	n.d.	n.d.	0.424458	n.d.	n.d.	0.171416	n.d.	n.d.	n.d.	n.d.	n.d.	n.d.	n.d.	n.d.	n.d.	n.d.	n.d.	n.d.	n.d.	n.d.	n.d.	n.d.	n.d.	n.d.	n.d.	n.d.	n.d.	n.d.	41.8481	41.8481
Riga-2	21.7843	<LOQ	n.d.	n.d.	n.d.	n.d.	n.d.	n.d.	n.d.	n.d.	n.d.	n.d.	n.d.	n.d.	0.33875	n.d.	n.d.	n.d.	n.d.	n.d.	n.d.	<LOQ	n.d.	n.d.	n.d.	n.d.	n.d.	n.d.	n.d.	n.d.	n.d.	n.d.	0.0899288	n.d.	n.d.	n.d.	n.d.	n.d.	n.d.	n.d.	22.2129	22.2129
Madrid	223.142	5.4521	3.2836	n.d.	0.785925	0.788584	0.720089	n.d.	n.d.	n.d.	n.d.	n.d.	n.d.	n.d.	0.624443	0.0124766	n.d.	0.432621	n.d.	0.201625	n.d.	0.382676	n.d.	n.d.	n.d.	n.d.	n.d.	n.d.	n.d.	n.d.	n.d.	n.d.	n.d.	n.d.	n.d.	n.d.	n.d.	n.d.	n.d.	3.64213	235.826	239.468
Helsinki	86.5152	<LOQ	3.16839	0.983474	0.506119	0.441139	0.316839	n.d.	n.d.	n.d.	n.d.	n.d.	n.d.	n.d.	0.432621	n.d.	n.d.	<LOQ	n.d.	n.d.	n.d.	n.d.	n.d.	n.d.	n.d.	n.d.	n.d.	n.d.	n.d.	n.d.	n.d.	n.d.	<LOQ	n.d.	n.d.	n.d.	n.d.	n.d.	n.d.	n.d.	92.3638	92.3638
Trondheim	22.3137	4.97067	1.17683	n.d.	n.d.	0.206906	0.288035	0.279806	n.d.	n.d.	n.d.	n.d.	n.d.	n.d.	n.d.	n.d.	n.d.	n.d.	n.d.	0.160477	n.d.	<LOQ	n.d.	n.d.	n.d.	n.d.	n.d.	n.d.	n.d.	0.219581	n.d.	n.d.	n.d.	n.d.	n.d.	n.d.	n.d.	0.106189	n.d.	n.d.	29.7222	29.7222
Asker	45.5917	5.32454	n.d.	n.d.	n.d.	0.589486	0.596645	n.d.	n.d.	n.d.	n.d.	n.d.	n.d.	n.d.	n.d.	n.d.	n.d.	n.d.	n.d.	0.131673	n.d.	0.917599	n.d.	n.d.	n.d.	n.d.	n.d.	n.d.	n.d.	n.d.	n.d.	n.d.	n.d.	n.d.	n.d.	n.d.	n.d.	n.d.	n.d.	n.d.	53.1517	53.1517
Oslo-1	60.3646	6.88816	3.85145	n.d.	0.962861	0.64414	0.382676	0.201625	n.d.	n.d.	n.d.	n.d.	n.d.	n.d.	0.195904	n.d.	n.d.	<LOQ	0.130603	0.271576	0.117774	n.d.	n.d.	n.d.	n.d.	n.d.	n.d.	n.d.	n.d.	<LOQ	n.d.	n.d.	n.d.	n.d.	n.d.	n.d.	n.d.	0.0718392	n.d.	n.d.	74.0832	74.0832
Oslo-2	95.7525	2.29605	5.0077	n.d.	0.423824	0.292791	0.333298	0.246888	n.d.	<LOQ	n.d.	n.d.	n.d.	n.d.	0.804022	n.d.	n.d.	<LOQ	n.d.	0.148133	<LOQ	0.234543	n.d.	n.d.	n.d.	n.d.	n.d.	n.d.	n.d.	n.d.	n.d.	n.d.	n.d.	n.d.	n.d.	n.d.	0.238658	n.d.	n.d.	n.d.	105.778	105.778
Brussels-1	17.3436	7.64528	3.8679	2.68843	4.63737	1.05405	1.49367	0.139903	n.d.	n.d.	n.d.	n.d.	n.d.	n.d.	1.31419	n.d.	1.26929	4.51395	0.710151	3.41939	0.0828431	2.23433	n.d.	n.d.	n.d.	n.d.	n.d.	n.d.	n.d.	<LOQ	n.d.	n.d.	n.d.	<LOQ	n.d.	n.d.	n.d.	n.d.	n.d.	2.06188	52.4144	54.4762
Brussels-2	43.2576	7.59179	3.35356	2.91818	4.32876	1.45615	1.90926	n.d.	n.d.	n.d.	n.d.	n.d.	n.d.	n.d.	4.84046	n.d.	1.13869	5.30573	0.673419	2.90093	0.103067	2.20964	n.d.	n.d.	n.d.	n.d.	n.d.	n.d.	n.d.	0.275249	n.d.	n.d.	n.d.	<LOQ	n.d.	n.d.	n.d.	n.d.	n.d.	2.49023	82.2625	84.7527
Brussels-3	31.6839	12.9863	6.28329	5.1189	9.58746	2.17446	4.13948	n.d.	n.d.	<LOQ	n.d.	n.d.	n.d.	n.d.	n.d.	0.0459109	2.19984	13.2276	1.55907	8.66987	0.175422	4.27115	n.d.	n.d.	n.d.	n.d.	n.d.	n.d.	n.d.	0.290712	n.d.	n.d.	<LOQ	<LOQ	n.d.	n.d.	n.d.	n.d.	n.d.	3.14719	102.413	105.561
Tromsø	23.4154	6.26271	n.d.	n.d.	n.d.	0.21081	0.193395	n.d.	n.d.	n.d.	n.d.	n.d.	n.d.	n.d.	n.d.	n.d.	n.d.	n.d.	n.d.	0.0822958	n.d.	0.818844	n.d.	n.d.	n.d.	n.d.	n.d.	n.d.	n.d.	0.315454	n.d.	n.d.	n.d.	n.d.	n.d.	n.d.	n.d.	n.d.	n.d.	n.d.	31.2989	31.2989
Zurich	10.5936	<LOQ	0.925828	0.878677	0.925828	0.327926	0.506119	n.d.	n.d.	n.d.	n.d.	n.d.	n.d.	n.d.	1.08972	n.d.	0.106115	2.24065	0.269368	1.23855	<LOQ	1.24267	n.d.	n.d.	n.d.	n.d.	n.d.	n.d.	n.d.	0.16082	n.d.	n.d.	n.d.	n.d.	n.d.	n.d.	0.111099	n.d.	n.d.	n.d.	20.617	20.617
Copenhagen	<LOQ	5.843	n.d.	n.d.	0.522579	n.d.	0.543153	n.d.	n.d.	n.d.	n.d.	n.d.	n.d.	n.d.	0.534654	n.d.	n.d.	n.d.	n.d.	0.139903	n.d.	0.621334	n.d.	n.d.	n.d.	n.d.	n.d.	n.d.	n.d.	0.238137	n.d.	n.d.	n.d.	n.d.	n.d.	n.d.	n.d.	n.d.	n.d.	<LOQ	8.44276	8.44276
Cologne	45.7348	7.37988	4.63326	5.47158	4.81225	3.23632	2.66227	n.d.	n.d.	n.d.	n.d.	n.d.	n.d.	n.d.	3.58953	n.d.	0.820347	8.03002	1.62233	8.83652	0.246713	6.52812	n.d.	n.d.	n.d.	<LOQ	n.d.	n.d.	<LOQ	1.28192	<LOQ	n.d.	n.d.	n.d.	n.d.	n.d.	0.549325	n.d.	7.6305	12.6454	105.435	125.711
Seville	79.3056	9.82201	5.13115	11.9145	2.56763	2.112	0.946402	0.38679	0.106985	n.d.	n.d.	n.d.	n.d.	n.d.	0.848917	n.d.	n.d.	<LOQ	n.d.	n.d.	n.d.	1.1686	n.d.	n.d.	n.d.	n.d.	n.d.	n.d.	n.d.	n.d.	n.d.	n.d.	n.d.	n.d.	n.d.	n.d.	0.362102	n.d.	n.d.	n.d.	114.673	114.673
Frankfurt	58.8033	n.d.	1.15214	n.d.	0.547267	0.230329	0.49789	n.d.	n.d.	n.d.	n.d.	n.d.	n.d.	n.d.	2.8855	n.d.	n.d.	0.910137	0.110196	0.506119	<LOQ	n.d.	n.d.	n.d.	n.d.	n.d.	n.d.	n.d.	n.d.	n.d.	n.d.	n.d.	n.d.	n.d.	n.d.	n.d.	n.d.	n.d.	n.d.	3.04066	65.6429	68.6835
Vienna	82.6851	0.329183	0.378561	n.d.	n.d.	0.179579	n.d.	n.d.	n.d.	n.d.	n.d.	n.d.	n.d.	n.d.	0.355076	n.d.	n.d.	<LOQ	n.d.	0.0864106	n.d.	n.d.	n.d.	n.d.	n.d.	n.d.	n.d.	n.d.	n.d.	n.d.	n.d.	n.d.	n.d.	n.d.	n.d.	n.d.	n.d.	n.d.	n.d.	n.d.	84.0139	84.0139
London	77.7285	15.2494	6.26683	7.37202	5.01593	2.66635	2.81452	0.320954	0.127559	n.d.	n.d.	n.d.	n.d.	n.d.	3.74666	n.d.	0.204066	4.82413	0.497922	3.07786	0.104289	3.74035	n.d.	n.d.	n.d.	n.d.	n.d.	n.d.	n.d.	0.250507	<LOQ	n.d.	<LOQ	n.d.	n.d.	n.d.	0.160477	n.d.	1.78001	107.386	134.168	243.335
Paris	182.689	8.56288	2.88035	3.62354	2.5306	1.3117	0.571956	n.d.	n.d.	<LOQ	n.d.	n.d.	n.d.	n.d.	4.19969	n.d.	0.0979519	0.783615	0.199985	0.917599	n.d.	1.47721	n.d.	n.d.	n.d.	n.d.	n.d.	n.d.	<LOQ	0.615444	<LOQ	n.d.	n.d.	n.d.	n.d.	n.d.	n.d.	n.d.	1.99529	4.12153	210.462	216.578
Antwerp	267.882	n.d.	6.62893	7.02942	n.d.	3.37295	2.18495	0.30038	n.d.	n.d.	n.d.	n.d.	n.d.	n.d.	7.39945	0.0164355	0.0857079	2.12229	0.146928	0.650137	<LOQ	0.831188	n.d.	n.d.	n.d.	n.d.	n.d.	n.d.	<LOQ	0.225766	n.d.	n.d.	<LOQ	n.d.	n.d.	n.d.	n.d.	n.d.	560.358	13.774	298.876	873.008
Turin-1	17.3323	0.374446	0.148133	n.d.	n.d.	n.d.	n.d.	n.d.	n.d.	n.d.	0.128456	n.d.	n.d.	n.d.	0.39997	n.d.	n.d.	n.d.	n.d.	0.148133	n.d.	0.185166	n.d.	n.d.	n.d.	n.d.	n.d.	n.d.	n.d.	n.d.	n.d.	n.d.	<LOQ	n.d.	n.d.	n.d.	<LOQ	n.d.	n.d.	n.d.	18.7166	18.7166
Turin-2	34.9215	0.407364	0.522579	0.399032	0.39502	n.d.	0.271576	n.d.	n.d.	n.d.	0.0911138	n.d.	n.d.	n.d.	7.33823	0.00660367	0.0775453	0.628525	0.0734639	0.230428	n.d.	1.01635	n.d.	n.d.	n.d.	n.d.	n.d.	n.d.	n.d.	n.d.	n.d.	n.d.	n.d.	n.d.	n.d.	n.d.	<LOQ	n.d.	n.d.	<LOQ	46.3793	46.3793
Sofia	300.438	n.d.	n.d.	n.d.	n.d.	0.421619	n.d.	0.279806	n.d.	n.d.	n.d.	n.d.	n.d.	n.d.	0.934625	0.00669338	n.d.	0.21631	n.d.	0.098755	n.d.	n.d.	n.d.	n.d.	n.d.	n.d.	n.d.	n.d.	n.d.	n.d.	n.d.	n.d.	<LOQ	n.d.	n.d.	n.d.	n.d.	n.d.	n.d.	n.d.	302.395	302.395
Nuuk-1	23.2645	<LOQ	0.769466	n.d.	0.448512	0.288887	0.390905	n.d.	n.d.	n.d.	n.d.	n.d.	n.d.	n.d.	n.d.	n.d.	<LOQ	0.179579	0.0653013	0.432053	n.d.	0.164592	n.d.	n.d.	n.d.	n.d.	n.d.	n.d.	n.d.	n.d.	n.d.	n.d.	<LOQ	n.d.	n.d.	n.d.	0.246888	n.d.	n.d.	n.d.	26.2507	26.2507
Nuuk-2	<LOQ	<LOQ	0.238658	n.d.	n.d.	0.113213	n.d.	n.d.	n.d.	<LOQ	n.d.	n.d.	n.d.	n.d.	n.d.	n.d.	n.d.	<LOQ	n.d.	0.0617219	n.d.	<LOQ	n.d.	n.d.	n.d.	n.d.	n.d.	n.d.	n.d.	n.d.	n.d.	n.d.	<LOQ	n.d.	n.d.	n.d.	0.0617219	n.d.	n.d.	n.d.	0.475314	0.475314
Marseille	140.701	<LOQ	n.d.	n.d.	0.986178	0.330529	0.279806	n.d.	n.d.	n.d.	n.d.	n.d.	n.d.	n.d.	2.93039	0.00618662	n.d.	0.171416	0.0734639	0.3525	n.d.	0.606246	n.d.	n.d.	n.d.	n.d.	n.d.	n.d.	n.d.	0.34535	n.d.	n.d.	<LOQ	n.d.	n.d.	n.d.	0.302437	n.d.	3.00071	<LOQ	147.085	150.086
Min	8.29104	0.329183	0.148133	0.399032	0.39502	0.113213	0.193395	0.139903	0.0822958	0.0768232	0.0911138	0	0	0	0.195904	0.00611383	0.0775453	0.171416	0.0653013	0.0617219	0.0746917	0.0864106	0	0	0	0	0	0.0871669	0.0989659	0.16082	0	0	0.0899288	0	0	0	0.0617219	0.0718392	1.78001	1.99751	0.475314	0.475314
Max	300.438	15.2494	16.1547	23.6679	18.5824	7.40957	14.0561	0.530808	0.320954	0.0929202	0.128456	0	0	0	18.2476	0.0459109	2.19984	13.2276	1.62233	8.83652	0.247455	7.66997	0	0	0	0	0	0.0871669	0.0989659	4.44728	0	0	0.0899288	0	0	0	0.549325	0.106189	560.358	107.386	302.395	873.008
Median	45.7348	5.90678	3.226	3.63966	1.22827	0.788584	0.767409	0.279806	0.129616	0.0848717	0.109785	-	-	-	1.28766	0.00935033	0.204066	1.36929	0.199985	0.432053	0.117774	1.14803	-	-	-	-	-	0.0871669	0.0989659	0.292259	-	-	0.0899288	-	-	-	0.246888	0.0890143	3.91956	3.88183	68.4532	74.0832
DF (%)	95.122	68.2927	82.9268	53.6585	78.0488	85.3659	82.9268	43.9024	14.6341	4.87805	4.87805	0	0	0	82.9268	24.3902	36.5854	68.2927	56.0976	90.2439	31.7073	73.1707	0	0	0	0	0	2.43902	2.43902	39.0244	0	0	2.43902	0	0	0	31.7073	4.87805	39.0244	48.7805	100	100

## Sheet: Table 5
Table 5. Temporal and spatial reproducibility of PFAS measurements in European tap water. (ng L-1）
Sample name	TFA	PFPrA	PFBA	PFPeA	PFHxA	PFHpA	PFOA	PFNA	PFDA	PFUnDA	PFDoDA	PFTrDA	PFTeDA	PFPeDA	TFMS	PFEtS	PFPrS	PFBS	PFPeS	PFHxS	PFHpS	PFOS	PFNS	PFDS	FOSAA	FOSA	MeFOSAA	EtFOSAA	4:2 FTS	6:2 FTS	8:2 FTS	9Cl-PF3ONS	11Cl-PF3OUdS	NaDONA	FPrPA	FPePA	FHpPA	HFPO-DA	BF4-	PF6-	EF
Stockholm-2023-Jan	79.9815	4.78962	2.88035	n.d.	1.70352	0.866662	0.921713	0.337413	n.d.	n.d.	n.d.	n.d.	n.d.	n.d.	0.759127	0.00611383	n.d.	1.30603	0.326506	1.13157	0.115704	1.71175	n.d.	n.d.	n.d.	n.d.	n.d.	n.d.	n.d.	<LOQ	n.d.	n.d.	<LOQ	n.d.	n.d.	n.d.	n.d.	n.d.	3.9351	2.01527	159.118
Stockholm-2024-Jan	79.6811	4.88289	3.12587	n.d.	1.66512	1.38848	0.754378	n.d.	n.d.	n.d.	n.d.	n.d.	n.d.	n.d.	0.991763	n.d.	n.d.	1.38085	0.282972	1.08493	n.d.	1.62809	n.d.	n.d.	n.d.	n.d.	n.d.	n.d.	n.d.	n.d.	n.d.	n.d.	n.d.	n.d.	n.d.	n.d.	n.d.	n.d.	16.8679	n.d.	174.354
Berlin-repli-1	n.d.	n.d.	2.84332	2.69649	1.85166	0.999393	2.99968	n.d.	0.271576	n.d.	n.d.	n.d.	n.d.	n.d.	2.4488	0.0232636	n.d.	2.06107	0.208148	1.24267	n.d.	3.32887	n.d.	n.d.	n.d.	<LOQ	n.d.	0.0866646	n.d.	<LOQ	n.d.	n.d.	<LOQ	n.d.	n.d.	n.d.	n.d.	n.d.	2.55682	34.1286	188.193
Berlin-repli-2	9.57074	n.d.	2.40304	2.15236	2.46065	0.870565	2.97911	n.d.	n.d.	0.0768232	n.d.	n.d.	n.d.	n.d.	2.75898	0.0213862	n.d.	2.06923	0.261205	1.20152	n.d.	2.53471	n.d.	n.d.	n.d.	<LOQ	n.d.	0.0839162	n.d.	<LOQ	<LOQ	n.d.	<LOQ	n.d.	n.d.	n.d.	n.d.	n.d.	<LOQ	42.8156	152.39
Berlin-repli-3	7.85621	n.d.	2.18084	1.45103	2.30017	0.847142	2.95031	n.d.	0.201625	n.d.	n.d.	n.d.	n.d.	n.d.	2.51818	0.01706	n.d.	2.23657	0.204066	1.16037	0.142462	3.48111	n.d.	n.d.	n.d.	<LOQ	n.d.	0.0909198	n.d.	<LOQ	n.d.	n.d.	<LOQ	n.d.	n.d.	n.d.	n.d.	n.d.	1.9043	36.7742	140.603
Marseille-repli-1	135.148	<LOQ	n.d.	n.d.	1.06573	0.281079	0.238658	n.d.	n.d.	n.d.	n.d.	n.d.	n.d.	n.d.	2.25698	0.00560775	n.d.	0.167335	0.0693826	0.341528	n.d.	0.473201	n.d.	n.d.	n.d.	n.d.	n.d.	n.d.	n.d.	0.337103	n.d.	n.d.	<LOQ	n.d.	n.d.	0.288035	n.d.	n.d.	n.d.	<LOQ	120.345
Marseille-repli-2	164.917	<LOQ	n.d.	n.d.	0.98755	0.277176	0.29215	n.d.	n.d.	n.d.	n.d.	n.d.	n.d.	n.d.	3.76707	0.00627709	n.d.	0.159172	0.0653013	0.357987	n.d.	0.872336	n.d.	n.d.	n.d.	n.d.	n.d.	n.d.	n.d.	0.312361	n.d.	n.d.	<LOQ	n.d.	n.d.	n.d.	n.d.	n.d.	n.d.	<LOQ	150.777
Marseille-repli-3	122.036	<LOQ	n.d.	n.d.	0.905254	0.433331	0.308609	n.d.	n.d.	n.d.	n.d.	n.d.	n.d.	n.d.	2.76714	0.00637504	n.d.	0.187741	0.0857079	0.357987	n.d.	0.473201	n.d.	n.d.	n.d.	n.d.	n.d.	n.d.	n.d.	0.386586	n.d.	n.d.	<LOQ	n.d.	n.d.	0.316839	n.d.	n.d.	3.00071	<LOQ	163.71

## Sheet: Table 6
Table 6. Concentrations of individual PFAS and extractable fluorine (ng F L-1) in European tap water.
Sample name	TFA	PFPrA	PFBA	PFPeA	PFHxA	PFHpA	PFOA	PFNA	PFDA	PFUnDA	PFDoDA	TFMS	PFEtS	PFPrS	PFBS	PFPeS	PFHxS	PFHpS	PFOS	EtFOSAA	4:2 FTS	6:2 FTS	11Cl-PF3OUdS	FPePA	FHpPA	BF4-	PF6-	∑PFAS	UEF	EF	sum targets	ΣPFAS contribution to EF (%)	UEF contribution to EF (%)
PFAS category	PFCA	PFCA	PFCA	PFCA	PFCA	PFCA	PFCA	PFCA	PFCA	PFCA	PFCA	PFSA	PFSA	PFSA	PFSA	PFSA	PFSA	PFSA	PFSA	FOSA	FTSA	FTSA	fluorinated alternatives	FTCA	FTCA	inorganic fluorine	inorganic fluorine
The Hague	29.5482	3.72919	3.20652	2.94564	2.31071	1.58053	2.16938	0.19807	0.092659	n.d.	n.d.	6.98064	n.d.	0.0871995	1.89065	0.0953207	0.483978	0.0474101	0.607274	n.d.	n.d.	n.d.	n.d.	0.0854687	n.d.	118.347	17.624	56.0588	112.97	305	192.03	18.3799	37.0393
Amsterdam	4.74817	2.19914	2.78258	1.22123	0.827021	0.621588	2.16654	n.d.	n.d.	n.d.	n.d.	1.6909	n.d.	0.0523197	1.41682	0.061103	0.2318	<LOQ	0.0852314	n.d.	n.d.	n.d.	<LOQ	0.168424	n.d.	3.1773	1.57046	18.2729	66.81	89.8306	23.0206	20.3415	74.3733
Milan	4.18221	2.36702	2.98556	2.37695	1.95353	1.43443	2.46185	0.175105	n.d.	<LOQ	n.d.	2.25922	n.d.	0.126439	1.31179	0.171088	0.580773	0.0775194	0.889603	n.d.	n.d.	n.d.	<LOQ	n.d.	n.d.	n.d.	2.65756	23.3531	66.08	92.0906	26.0106	25.3588	71.7554
Stuttgart	9.95661	3.35507	1.82936	0.744272	0.813283	0.446268	0.562222	0.163623	0.0579119	<LOQ	n.d.	1.50511	n.d.	n.d.	0.431816	0.0513265	0.351521	0.0592156	1.64071	n.d.	<LOQ	0.25928	<LOQ	n.d.	n.d.	2.00938	2.03811	22.2276	57.54	83.8151	26.2751	26.5198	68.6511
Birmingham	31.8507	0.671494	0.686011	n.d.	0.414884	0.217821	0.235679	0.160752	n.d.	0.0658529	n.d.	0.198287	n.d.	n.d.	0.212407	n.d.	0.160477	n.d.	n.d.	n.d.	n.d.	<LOQ	n.d.	0.18602	n.d.	5.60449	<LOQ	35.0604	54.56	95.2249	40.6649	36.8185	57.296
Warsaw	4.93796	1.55403	1.63666	2.41888	0.989128	0.972228	0.795061	n.d.	n.d.	<LOQ	n.d.	0.666681	n.d.	n.d.	0.758595	n.d.	0.405013	n.d.	n.d.	n.d.	n.d.	n.d.	n.d.	n.d.	n.d.	19.7964	10.4924	15.1342	49.16	94.5831	45.4231	16.001	51.9755
Belgrade	9.86796	<LOQ	2.86737	0.356412	0.403894	n.d.	0.153333	n.d.	n.d.	n.d.	<LOQ	0.477762	0.00519047	n.d.	0.315109	n.d.	0.216516	n.d.	0.729794	n.d.	n.d.	0.13411	n.d.	n.d.	n.d.	3.41827	2.33649	15.5275	62.46	83.7422	21.2822	18.542	74.586
Prague	62.9172	3.47978	10.0872	0.605376	0.535777	0.483457	0.46	0.189458	n.d.	n.d.	n.d.	0.683856	n.d.	n.d.	n.d.	n.d.	0.0967956	n.d.	0.210415	n.d.	n.d.	n.d.	n.d.	0.191048	n.d.	n.d.	3.98896	79.9403	90.42	174.349	83.9293	45.8507	51.8614
Leipzig	115.405	n.d.	3.38638	3.77639	2.70362	2.32963	2.07284	0.370305	0.225856	n.d.	n.d.	0.482446	0.00373698	0.0675796	0.952329	0.119762	0.323501	0.110807	3.71822	n.d.	n.d.	n.d.	n.d.	n.d.	n.d.	60.6525	48.7662	136.048	163.55	409.017	245.467	33.2623	39.9861
Berlin	4.39529	n.d.	1.54588	1.36537	1.47179	0.616275	2.05391	n.d.	0.166497	0.0544448	n.d.	0.985189	0.0098198	n.d.	1.21375	0.134427	0.743798	0.0904271	2.01626	0.0481083	n.d.	<LOQ	<LOQ	n.d.	n.d.	1.95302	29.8021	16.9112	113.4	162.066	48.6663	10.4348	69.9714
Stockholm	40.3447	2.79149	1.79853	n.d.	1.1375	0.589712	0.636049	0.235387	n.d.	n.d.	n.d.	0.290404	0.00291866	n.d.	0.746924	0.19553	0.700494	0.0734423	1.10801	n.d.	n.d.	<LOQ	<LOQ	n.d.	n.d.	3.44548	1.58442	50.651	103.41	159.091	55.6809	31.8378	65.0006
Bremen	31.1393	n.d.	0.120759	n.d.	0.27201	n.d.	n.d.	n.d.	n.d.	<LOQ	n.d.	0.132712	n.d.	n.d.	0.357123	0.0464383	0.150288	<LOQ	0.0559331	n.d.	n.d.	0.169873	<LOQ	0.0477619	n.d.	n.d.	n.d.	32.4921	64.75	97.2421	32.4921	33.4136	66.5864
Lyon-1	44.0279	4.15127	1.74971	2.7124	2.2063	1.51413	2.35963	0.229646	n.d.	<LOQ	n.d.	n.d.	n.d.	0.111179	0.807612	0.317736	2.51159	n.d.	4.96473	n.d.	n.d.	0.196695	n.d.	n.d.	n.d.	122.817	4.91379	67.8606	66.93	262.521	195.591	25.8496	25.4951
Lyon-2	10.4135	3.5805	5.09498	15.3886	12.4081	5.04177	9.69975	0.192329	n.d.	<LOQ	n.d.	0.690101	n.d.	0.263778	1.21609	0.364174	2.56508	0.157071	3.92597	<LOQ	0.051737	2.57134	n.d.	n.d.	n.d.	2.79253	<LOQ	73.6248	149.85	226.267	76.4173	32.5389	66.227
Riga-1	16.9334	3.49177	n.d.	n.d.	0.417632	0.515334	n.d.	0.215293	n.d.	n.d.	n.d.	0.162377	n.d.	n.d.	0.0980338	n.d.	n.d.	n.d.	n.d.	n.d.	n.d.	n.d.	n.d.	n.d.	n.d.	n.d.	n.d.	21.8338	100.71	122.544	21.8338	17.8172	82.1828
Riga-2	10.9885	<LOQ	n.d.	n.d.	n.d.	n.d.	n.d.	n.d.	n.d.	n.d.	n.d.	0.129589	n.d.	n.d.	n.d.	n.d.	n.d.	n.d.	<LOQ	n.d.	n.d.	n.d.	0.0540198	n.d.	n.d.	n.d.	n.d.	11.1721	53.22	64.3921	11.1721	17.3501	82.6499
Madrid	112.558	3.1776	2.05033	n.d.	0.524787	0.536585	0.496913	n.d.	n.d.	n.d.	n.d.	0.238881	0.00595618	n.d.	0.247419	n.d.	0.124815	n.d.	0.247704	n.d.	n.d.	n.d.	n.d.	n.d.	n.d.	n.d.	2.86347	120.209	132.61	255.683	123.073	47.015	51.8651
Helsinki	43.6404	<LOQ	1.97838	0.639445	0.337952	0.300169	0.218642	n.d.	n.d.	n.d.	n.d.	0.165499	n.d.	n.d.	<LOQ	n.d.	n.d.	n.d.	n.d.	n.d.	n.d.	n.d.	<LOQ	n.d.	n.d.	n.d.	n.d.	47.2805	98.94	146.221	47.2805	32.3351	67.6649
Trondheim	11.2556	2.89702	0.734828	n.d.	n.d.	0.140787	0.198765	0.195199	n.d.	n.d.	n.d.	n.d.	n.d.	n.d.	n.d.	n.d.	0.0993428	n.d.	<LOQ	n.d.	n.d.	0.126958	n.d.	n.d.	0.0684504	n.d.	n.d.	15.7169	61.27	76.9869	15.7169	20.4151	79.5849
Asker	22.9976	3.10326	n.d.	n.d.	n.d.	0.40111	0.411728	n.d.	n.d.	n.d.	n.d.	n.d.	n.d.	n.d.	n.d.	n.d.	0.0815121	n.d.	0.593957	n.d.	n.d.	n.d.	n.d.	n.d.	n.d.	n.d.	n.d.	27.5892	105.73	133.319	27.5892	20.6941	79.3059
Oslo-1	30.4494	4.01457	2.40489	n.d.	0.642933	0.438299	0.264074	0.140658	n.d.	n.d.	n.d.	0.0749431	n.d.	n.d.	<LOQ	0.0782118	0.168119	0.0747561	n.d.	n.d.	n.d.	<LOQ	n.d.	n.d.	0.046308	n.d.	n.d.	38.7972	84.39	123.187	38.7972	31.4945	68.5055
Oslo-2	48.2999	1.33819	3.12687	n.d.	0.283	0.199227	0.23	0.172235	n.d.	<LOQ	n.d.	0.307579	n.d.	n.d.	<LOQ	n.d.	0.0917011	<LOQ	0.151818	n.d.	n.d.	n.d.	n.d.	0.1458	n.d.	n.d.	n.d.	54.3464	79.23	133.576	54.3464	40.6856	59.3144
Brussels-1	8.74854	4.45584	2.41517	1.74799	3.09652	0.717217	1.03074	0.0975997	n.d.	n.d.	n.d.	0.502743	n.d.	0.677976	2.58156	0.425277	2.11677	0.0525842	1.44627	n.d.	n.d.	<LOQ	n.d.	n.d.	n.d.	n.d.	1.62106	30.1128	116.01	147.744	31.7339	20.3818	78.521
Brussels-2	21.8202	4.42466	2.094	1.89737	2.89045	0.990822	1.31753	n.d.	n.d.	n.d.	n.d.	1.85172	n.d.	0.608217	3.03438	0.40328	1.79581	0.0654213	1.43029	n.d.	n.d.	0.159144	n.d.	n.d.	n.d.	n.d.	1.95784	44.7833	207.64	254.381	46.7411	17.6048	81.6255
Brussels-3	15.9822	7.56869	3.92337	3.32826	6.40185	1.47959	2.85654	n.d.	n.d.	<LOQ	n.d.	n.d.	0.0219173	1.17501	7.56494	0.933654	5.36706	0.111348	2.76469	n.d.	n.d.	0.168085	<LOQ	n.d.	n.d.	n.d.	2.47434	59.6472	82.38	144.502	62.1215	41.2779	57.0098
Tromsø	11.8113	3.65005	n.d.	n.d.	0	0.143443	0.133457	n.d.	n.d.	n.d.	n.d.	n.d.	n.d.	n.d.	n.d.	n.d.	0.050945	n.d.	0.530033	n.d.	n.d.	0.18239	n.d.	n.d.	n.d.	n.d.	n.d.	16.5016	48.44	64.9416	16.5016	25.41	74.59
Zurich	5.34368	<LOQ	0.578099	0.571307	0.618205	0.223134	0.349259	n.d.	n.d.	n.d.	n.d.	0.416871	n.d.	0.0566797	1.28144	0.161312	0.766723	<LOQ	0.804372	n.d.	n.d.	0.0929832	n.d.	0.0678722	n.d.	n.d.	n.d.	11.3319	130.77	142.102	11.3319	7.97451	92.0255
Copenhagen	<LOQ	3.40543	n.d.	n.d.	0.348942	0	0.374815	n.d.	n.d.	n.d.	n.d.	0.204532	n.d.	n.d.	n.d.	n.d.	0.0866066	n.d.	0.402186	n.d.	n.d.	0.137687	n.d.	n.d.	n.d.	n.d.	<LOQ	4.9602	79.12	84.0802	4.9602	5.89937	94.1006
Cologne	23.0698	4.30116	2.89307	3.55757	3.21329	2.20212	1.83716	n.d.	n.d.	n.d.	n.d.	1.37318	n.d.	0.438177	4.59242	0.971538	5.47022	0.156599	4.22561	n.d.	<LOQ	0.741184	n.d.	0.33559	n.d.	6.68108	9.94187	59.3786	118.61	194.612	76.0016	30.5114	60.947
Seville	40.0037	5.72448	3.20395	7.74672	1.71449	1.43709	0.653086	0.269834	0.0752854	n.d.	n.d.	0.324753	n.d.	n.d.	<LOQ	n.d.	n.d.	n.d.	0.756429	n.d.	n.d.	n.d.	n.d.	0.221213	n.d.	n.d.	n.d.	62.131	162.46	224.591	62.131	27.6641	72.3359
Frankfurt	29.6618	n.d.	0.719412	n.d.	0.365428	0.156725	0.34358	n.d.	n.d.	n.d.	n.d.	1.10385	n.d.	n.d.	0.520513	0.0659912	0.313312	<LOQ	n.d.	n.d.	n.d.	n.d.	n.d.	n.d.	n.d.	n.d.	2.39059	33.2507	118.9	154.541	35.6412	21.5157	76.9374
Vienna	41.7084	0.191855	0.236378	n.d.	n.d.	0.122193	n.d.	n.d.	n.d.	n.d.	n.d.	0.135834	n.d.	n.d.	<LOQ	n.d.	0.0534923	n.d.	n.d.	n.d.	n.d.	n.d.	n.d.	n.d.	n.d.	n.d.	n.d.	42.4482	127.71	170.158	42.4482	24.9463	75.0537
London	39.2082	8.8877	3.91309	4.79322	3.3493	1.81429	1.94222	0.223905	0.0897634	n.d.	n.d.	1.43329	n.d.	0.108999	2.75895	0.298183	1.90534	0.0661971	2.42111	n.d.	n.d.	0.144839	<LOQ	0.0980377	n.d.	1.55853	84.4278	73.4566	192.12	351.563	159.443	20.8943	54.6474
Paris	92.1529	4.99064	1.79853	2.35599	1.68976	0.892537	0.394691	n.d.	n.d.	<LOQ	n.d.	1.60659	n.d.	0.0523197	0.448155	0.119762	0.568037	n.d.	0.95619	n.d.	<LOQ	0.35584	n.d.	n.d.	n.d.	1.74703	3.24038	108.382	104.79	218.159	113.369	49.6802	48.0337
Antwerp	135.126	n.d.	4.13919	4.57046	n.d.	2.29509	1.50778	0.209552	n.d.	n.d.	n.d.	2.83066	0.0078461	0.0457797	1.21375	0.0879883	0.402466	<LOQ	0.538023	n.d.	<LOQ	0.130534	<LOQ	n.d.	n.d.	490.636	10.8292	153.105	1934.61	2589.18	654.57	5.91327	74.719
Turin-1	8.74286	0.218235	0.0924959	n.d.	n.d.	n.d.	n.d.	n.d.	n.d.	n.d.	0.0915744	0.153009	n.d.	n.d.	n.d.	n.d.	0.0917011	n.d.	0.119857	n.d.	n.d.	n.d.	<LOQ	<LOQ	n.d.	n.d.	n.d.	9.50973	13.22	22.7297	9.50973	41.8383	58.1617
Turin-2	17.6153	0.237421	0.326305	0.259447	0.263767	n.d.	0.187407	n.d.	n.d.	n.d.	0.0649539	2.80724	0.00267512	0.0414198	0.359457	0.0439942	0.142646	n.d.	0.65788	n.d.	n.d.	n.d.	n.d.	<LOQ	n.d.	n.d.	<LOQ	23.0099	39.38	62.3899	23.0099	36.8808	63.1192
Sofia	151.548	n.d.	n.d.	n.d.	n.d.	0.286887	0	0.195199	n.d.	n.d.	n.d.	0.357541	0.00319533	n.d.	0.123709	n.d.	0.061134	n.d.	n.d.	n.d.	n.d.	n.d.	<LOQ	n.d.	n.d.	n.d.	n.d.	152.576	132.8	285.376	152.576	53.4649	46.5351
Nuuk-1	11.7352	<LOQ	0.480465	n.d.	0.299486	0.196571	0.269753	n.d.	n.d.	n.d.	n.d.	n.d.	n.d.	<LOQ	0.102702	0.0391059	0.267461	n.d.	0.106539	n.d.	n.d.	n.d.	<LOQ	0.150827	n.d.	n.d.	n.d.	13.6481	116.47	130.118	13.6481	10.489	89.511
Nuuk-2	<LOQ	<LOQ	0.149021	n.d.	n.d.	0.0770344	n.d.	n.d.	n.d.	<LOQ	n.d.	n.d.	n.d.	n.d.	<LOQ	n.d.	0.0382088	n.d.	<LOQ	n.d.	n.d.	n.d.	<LOQ	0.0377068	n.d.	n.d.	n.d.	0.301971	26.12	26.422	0.301971	1.14288	98.8571
Marseille	70.9729	<LOQ	n.d.	n.d.	0.658503	0.224905	0.193086	n.d.	n.d.	n.d.	n.d.	1.12102	0.00290567	n.d.	0.0980338	0.0439942	0.218215	n.d.	0.39242	n.d.	n.d.	0.199676	<LOQ	0.184763	n.d.	2.62735	<LOQ	74.3104	69.44	146.378	76.9377	50.7662	47.4389
Min	4.18221	0.191855	0.0924959	0.259447	0	0	0	0.0975997	0.0579119	0.0544448	0.0649539	0.0749431	0.00267512	0.0414198	0.0980338	0.0391059	0.0382088	0.0474101	0.0559331	0.0481083	0.051737	0.0929832	0.0540198	0.0377068	0.046308	1.55853	1.57046	0.301971	13.22	22.7297	0.301971	1.14288	25.4951
Max	151.548	8.8877	10.0872	15.3886	12.4081	5.04177	9.69975	0.370305	0.225856	0.0658529	0.0915744	6.98064	0.0219173	1.17501	7.56494	0.971538	5.47022	0.157071	4.96473	0.0481083	0.051737	2.57134	0.0540198	0.33559	0.0684504	490.636	84.4278	153.105	1934.61	2589.18	654.57	53.4649	98.8571
Median	23.0698	3.4426	2.01435	2.36647	0.813283	0.525959	0.496913	0.195199	0.0912112	0.0601489	0.0782641	0.492595	0.00446372	0.108999	0.783103	0.119762	0.267461	0.0747561	0.743112	0.0481083	0.051737	0.168979	0.0540198	0.150827	0.0573792	3.43188	3.05192	35.0604	98.94	144.502	42.4482	25.41	68.5055
DF (%)	95.122	68.2927	82.9268	53.6585	80.4878	87.8049	85.3659	43.9024	14.6341	4.87805	4.87805	82.9268	24.3902	36.5854	68.2927	56.0976	90.2439	31.7073	73.1707	2.43902	2.43902	39.0244	2.43902	31.7073	4.87805	39.0244	48.7805	100	100	100	100	100	100

## Sheet: Table 7
Table 7. Percentage of individual PFAS and UEF relative to EF in European tap water (%).
Sample name	TFA	PFPrA	PFBA	PFPeA	PFHxA	PFHpA	PFOA	PFNA	PFDA	PFUnDA	PFDoDA	TFMS	PFEtS	PFPrS	PFBS	PFPeS	PFHxS	PFHpS	PFOS	EtFOSAA	4:2 FTS	6:2 FTS	11Cl-PF3OUdS	FPePA	FHpPA	BF4-	PF6-	UEF
PFAS category	PFCA	PFCA	PFCA	PFCA	PFCA	PFCA	PFCA	PFCA	PFCA	PFCA	PFCA	PFSA	PFSA	PFSA	PFSA	PFSA	PFSA	PFSA	PFSA	FOSA	FTSA	FTSA	fluorinated alternatives	FTCA	FTCA	inorganic fluorine	inorganic fluorine	UEF	Short-chain PFCAs (excluding TFA)	Long-chain PFCAs	PFSAs	FOSAs	FTSAs	fluorinated alternatives	FTCAs	IFs
Sofia	53.2527	0	0	0	0	0.100809	0	0.0685913	0	0	0	0.125637	0.00112281	0	0.0434704	0	0.021482	0	0	0	0	0	0	0	0	0	0	46.3862	0.100809	0.0685913	0.191712	0	0	0	0	0
Riga-2	17.1084	0	0	0	0	0	0	0	0	0	0	0.201762	0	0	0	0	0	0	0	0	0	0	0.0841053	0	0	0	0	82.6057	0	0	0.201762	0	0	0.0841053	0	0
Turin-2	27.828	0.37507	0.515486	0.409866	0.416691	0	0.29606	0	0	0	0.102612	4.43479	0.00422606	0.0654336	0.567859	0.0695006	0.225348	0	1.0393	0	0	0	0	0	0	0	0	63.6497	1.71711	0.398672	6.40646	0	0	0	0	0
Bremen	32.0158	0	0.124158	0	0.279667	0	0	0	0	0	0	0.136447	0	0	0.367176	0.0477455	0.154518	0	0.0575076	0	0	0.174655	0	0.0491064	0	0	0	66.5932	0.403825	0	0.763395	0	0.174655	0	0.0491064	0
Zurich	3.75908	0	0.406671	0.401893	0.434884	0.156967	0.245691	0	0	0	0	0.293253	0	0.039872	0.901447	0.113477	0.539361	0	0.565846	0	0	0.0654103	0	0.0477456	0	0	0	92.0284	1.40042	0.245691	2.45326	0	0.0654103	0	0.0477456	0
Frankfurt	19.3781	0	0.469992	0	0.238734	0.102389	0.224461	0	0	0	0	0.721145	0	0	0.340051	0.0431121	0.204687	0	0	0	0	0	0	0	0	0	1.56177	76.7156	0.811115	0.224461	1.309	0	0	0	0	1.56177
Berlin	2.74029	0	0.963793	0.851254	0.917598	0.384223	1.28053	0	0.103804	0.0339441	0	0.614225	0.00612225	0	0.756725	0.0838095	0.463727	0.0563776	1.25705	0.0299936	0	0	0	0	0	1.21763	18.5804	69.6585	3.11687	1.41828	3.23804	0.0299936	0	0	0	19.798
London	11.1517	2.52785	1.11297	1.36329	0.952613	0.516025	0.55241	0.0636835	0.0255307	0	0	0.407658	0	0.0310018	0.784706	0.0848096	0.541921	0.0188279	0.688615	0	0	0.0411954	0	0.027884	0	0.44328	24.0131	54.651	6.47275	0.641624	2.55754	0	0.0411954	0	0.027884	24.4564
Marseille	48.9657	0	0	0	0.454315	0.155167	0.133214	0	0	0	0	0.773418	0.00200469	0	0.0676356	0.0303525	0.150551	0	0.270739	0	0	0.13776	0	0.127472	0	1.81266	0	46.919	0.609481	0.133214	1.2947	0	0.13776	0	0.127472	1.81266
Birmingham	33.1354	0.698579	0.713683	0	0.431619	0.226608	0.245185	0.167237	0	0.0685092	0	0.206285	0	0	0.220974	0	0.16695	0	0	0	0	0	0	0.193524	0	5.83056	0	57.6949	2.07049	0.480931	0.594209	0	0	0	0.193524	5.83056
The Hague	9.68623	1.22247	1.05113	0.965614	0.757478	0.518117	0.711148	0.0649296	0.0303747	0	0	2.28833	0	0.028585	0.619777	0.0312472	0.158653	0.0155416	0.199071	0	0	0	0	0.0280176	0	38.7956	5.77736	37.0504	4.51481	0.806452	3.34121	0	0	0	0.0280176	44.5729
Antwerp	5.23612	0	0.160393	0.177105	0	0.0889346	0.0584261	0.00812012	0	0	0	0.109688	0.000304035	0.00177396	0.0470327	0.00340953	0.0155955	0	0.0208483	0	0	0.00505818	0	0	0	19.0121	0.419629	74.6355	0.426432	0.0665463	0.198652	0	0.00505818	0	0	19.4317
Lyon-1	18.3742	1.73245	0.730208	1.13197	0.920757	0.63189	0.984744	0.0958383	0	0	0	0	0	0.0463985	0.337041	0.132601	1.04816	0	2.07193	0	0	0.0820868	0	0	0	51.2551	2.05067	18.3739	5.14727	1.08058	3.63613	0	0.0820868	0	0	53.3058
Belgrade	12.1561	0	3.53225	0.439056	0.497548	0	0.188888	0	0	0	0	0.588545	0.00639402	0	0.388176	0	0.266722	0	0.899018	0	0	0.165208	0	0	0	4.2109	2.87827	73.7829	4.46886	0.188888	2.14885	0	0.165208	0	0	7.08917
Leipzig	28.2902	0	0.830132	0.92574	0.66276	0.571082	0.508133	0.0907759	0.0553661	0	0	0.118266	0.000916078	0.0165664	0.233452	0.0293583	0.0793026	0.0271631	0.911479	0	0	0	0	0	0	14.8683	11.9545	39.8265	2.98971	0.654275	1.4165	0	0	0	0	26.8227
Warsaw	5.2179	1.64213	1.72945	2.55601	1.0452	1.02735	0.840135	0	0	0	0	0.704477	0	0	0.801601	0	0.427974	0	0	0	0	0	0	0	0	20.9187	11.0872	52.0018	8.00014	0.840135	1.93405	0	0	0	0	32.006
Nuuk-1	9.01832	0	0.36923	0	0.230151	0.151062	0.207301	0	0	0	0	0	0	0	0.0789251	0.0300523	0.20554	0	0.0818739	0	0	0	0	0.115909	0	0	0	89.5116	0.750442	0.207301	0.396392	0	0	0	0.115909	0
Vienna	24.4996	0.112696	0.138849	0	0	0.0717761	0	0	0	0	0	0.0797894	0	0	0	0	0.0314215	0	0	0	0	0	0	0	0	0	0	75.0659	0.323321	0	0.111211	0	0	0	0	0
Nuuk-2	0	0	0.561857	0	0	0.290444	0	0	0	0	0	0	0	0	0	0	0.144059	0	0	0	0	0	0	0.142167	0	0	0	98.8615	0.852301	0	0.144059	0	0	0	0.142167	0
Helsinki	29.9495	0	1.35772	0.438837	0.231929	0.205999	0.150049	0	0	0	0	0.113579	0	0	0	0	0	0	0	0	0	0	0	0	0	0	0	67.5524	2.23449	0.150049	0.113579	0	0	0	0	0
Oslo-2	36.1294	1.001	2.33897	0	0.21169	0.149026	0.172045	0.128835	0	0	0	0.230076	0	0	0	0	0.0685944	0	0.113564	0	0	0	0	0.109061	0	0	0	59.3477	3.70068	0.30088	0.412234	0	0	0	0.109061	0
Prague	36.0859	1.99581	5.78547	0.347211	0.307293	0.277285	0.263831	0.108663	0	0	0	0.392223	0	0	0	0	0.0555168	0	0.120683	0	0	0	0	0.109575	0	0	2.28786	51.8626	8.71308	0.372494	0.568423	0	0	0	0.109575	2.28786
Lyon-2	4.58358	1.57599	2.2426	6.77343	5.46151	2.21918	4.26943	0.0846552	0	0	0	0.303754	0	0.116104	0.535271	0.160294	1.12904	0.0691361	1.72805	0	0.0227725	1.1318	0	0	0	1.22916	0	66.3642	18.2727	4.35408	4.04165	0	1.15457	0	0	1.22916
Seville	17.8085	2.54838	1.42631	3.44862	0.763243	0.639753	0.290736	0.120123	0.033515	0	0	0.144571	0	0	0	0	0	0	0.336741	0	0	0	0	0.098478	0	0	0	72.341	8.82631	0.444374	0.481313	0	0	0	0.098478	0
Turin-1	38.5023	0.961078	0.407339	0	0	0	0	0	0	0	0.403281	0.673829	0	0	0	0	0.403839	0	0.527832	0	0	0	0	0	0	0	0	58.1205	1.36842	0.403281	1.6055	0	0	0	0	0
Oslo-1	24.6931	3.25563	1.95026	0	0.521389	0.355441	0.214152	0.114067	0	0	0	0.0607754	0	0	0	0.0634262	0.136336	0.0606237	0	0	0	0	0	0	0.0375537	0	0	68.5373	6.08272	0.328219	0.321162	0	0	0	0.0375537	0
Trondheim	14.6243	3.76407	0.954757	0	0	0.182924	0.258254	0.253621	0	0	0	0	0	0	0	0	0.129075	0	0	0	0	0.164955	0	0	0.0889371	0	0	79.5791	4.90175	0.511875	0.129075	0	0.164955	0	0.0889371	0
Riga-1	13.8152	2.84877	0	0	0.340726	0.420437	0	0.175648	0	0	0	0.132476	0	0	0.0799812	0	0	0	0	0	0	0	0	0	0	0	0	82.1868	3.60993	0.175648	0.212457	0	0	0	0	0
Copenhagen	0	4.03134	0	0	0.413077	0	0.443704	0	0	0	0	0.242124	0	0	0	0	0.102525	0	0.476106	0	0	0.162993	0	0	0	0	0	94.1281	4.44441	0.443704	0.820755	0	0.162993	0	0	0
Tromsø	18.1779	5.6175	0	0	0	0.220762	0.205393	0	0	0	0	0	0	0	0	0	0.0784055	0	0.815732	0	0	0.280702	0	0	0	0	0	74.6036	5.83826	0.205393	0.894137	0	0.280702	0	0	0
Asker	17.2555	2.32843	0	0	0	0.30096	0.308926	0	0	0	0	0	0	0	0	0	0.0611598	0	0.445655	0	0	0	0	0	0	0	0	79.2994	2.62939	0.308926	0.506815	0	0	0	0	0
Milan	4.60921	2.60869	3.29039	2.61964	2.15298	1.58089	2.71321	0.192984	0	0	0	2.48989	0	0.139349	1.44572	0.188557	0.64007	0.0854341	0.980432	0	0	0	0	0	0	0	2.9289	71.3337	12.2526	2.90619	5.96945	0	0	0	0	2.9289
Brussels-3	11.094	5.25381	2.72341	2.31031	4.44385	1.02706	1.98287	0	0	0	0	0	0.0152139	0.815636	5.25121	0.648097	3.72555	0.0772922	1.91911	0	0	0.116676	0	0	0	0	1.71757	56.8783	15.7584	1.98287	12.4521	0	0.116676	0	0	1.71757
Brussels-1	5.91372	3.012	1.63258	1.18158	2.09314	0.484815	0.696746	0.0659741	0	0	0	0.339838	0	0.458289	1.74505	0.287473	1.43086	0.0355451	0.977631	0	0	0	0	0	0	0	1.09578	78.549	8.40412	0.762721	5.27469	0	0	0	0	1.09578
Brussels-2	8.57511	1.73885	0.822922	0.745646	1.13592	0.389383	0.517776	0	0	0	0	0.727706	0	0.239023	1.19248	0.158485	0.705735	0.0257099	0.562089	0	0	0.0625421	0	0	0	0	0.76941	81.6312	4.83271	0.517776	3.61123	0	0.0625421	0	0	0.76941
Cologne	12.4892	2.3285	1.5662	1.92594	1.73956	1.19215	0.994574	0	0	0	0	0.74339	0	0.237214	2.48617	0.525957	2.96139	0.0847774	2.2876	0	0	0.401251	0	0.181677	0	3.6169	5.38218	58.8554	8.75236	0.994574	9.3265	0	0.401251	0	0.181677	8.99909
Amsterdam	5.27967	2.44531	3.09406	1.35794	0.919596	0.691167	2.40906	0	0	0	0	1.88018	0	0.0581763	1.57542	0.0679428	0.257747	0	0.0947721	0	0	0	0	0.187277	0	3.53296	1.74625	74.4025	8.50807	2.40906	3.93424	0	0	0	0.187277	5.27922
Stockholm	25.3552	1.75436	1.13031	0	0.714877	0.370613	0.399735	0.147933	0	0	0	0.182509	0.00183428	0	0.469416	0.122884	0.440236	0.0461559	0.696345	0	0	0	0	0	0	2.16536	0.995751	65.0065	3.97016	0.547668	1.95938	0	0	0	0	3.16111
Madrid	57.4729	1.6225	1.04691	0	0.26796	0.273983	0.253727	0	0	0	0	0.121974	0.00304126	0	0.126334	0	0.0637315	0	0.126479	0	0	0	0	0	0	0	1.4621	37.1584	3.21136	0.253727	0.44156	0	0	0	0	1.4621
Paris	42.2244	2.28671	0.824085	1.07951	0.774246	0.40896	0.180847	0	0	0	0	0.736139	0	0.0239728	0.205344	0.0548748	0.260274	0	0.438126	0	0	0.163045	0	0	0	0.800488	1.48474	48.0543	5.37351	0.180847	1.71873	0	0.163045	0	0	2.28523
Stuttgart	11.8781	4.00257	2.18241	0.887909	0.970238	0.532394	0.670725	0.195201	0.0690883	0	0	1.79558	0	0	0.515152	0.061232	0.419361	0.0706436	1.95735	0	0	0.309319	0	0	0	2.39717	2.43144	68.6541	8.57552	0.935014	4.81931	0	0.309319	0	0	4.82861
Min	0																											18.3739	0	0	0.11	0	0	0	0	0
Max	57.47																											98.8615	18.27	4.35	12.45	0.03	1.15	0.08	0.19	53.31
Median	17.11																											68.5373	3.97	0.4	1.31	0	0	0	0	1.23

## Sheet: Table 8
Table 8. Fluorine mass balance in European tap water categorized by PFAS chemical classes (ng F L-1).
Sample name	PFCAs	PFSAs	FOSAs	FTSAs	Fluorinated Alternatives	FTCA	∑BF4-+PF6-	UEF	EF
The Hague	45.7809	10.1925	0	0	0	0.0854687	135.971	112.97	305
Amsterdam	14.5663	3.53818	0	0	0	0.168424	4.74776	66.81	89.8306
Milan	17.9367	5.41643	0	0	0	0	2.65756	66.08	92.0906
Stuttgart	17.9286	4.03969	0	0.25928	0	0	4.04748	57.54	83.8151
Birmingham	34.3032	0.57117	0	0	0	0.18602	5.60449	54.56	95.2249
Warsaw	13.3039	1.83029	0	0	0	0	30.2888	49.16	94.5831
Belgrade	13.649	1.74437	0	0.13411	0	0	5.75476	62.46	83.7422
Prague	78.7582	0.991066	0	0	0	0.191048	3.98896	90.42	174.349
Leipzig	130.27	5.77838	0	0	0	0	109.419	163.55	409.017
Berlin	11.6695	5.19367	0.0481083	0	0	0	31.7551	113.4	162.066
Stockholm	47.5333	3.11772	0	0	0	0	5.0299	103.41	159.091
Bremen	31.532	0.742494	0	0.169873	0	0.0477619	0	64.75	97.2421
Lyon-1	58.951	8.71285	0	0.196695	0	0	127.731	66.93	262.521
Lyon-2	61.8195	9.18227	0	2.62308	0	0	2.79253	149.85	226.267
Riga-1	21.5734	0.26041	0	0	0	0	0	100.71	122.544
Riga-2	10.9885	0.129589	0	0	0.0540198	0	0	53.22	64.3921
Madrid	119.344	0.864775	0	0	0	0	2.86347	132.61	255.683
Helsinki	47.115	0.165499	0	0	0	0	0	98.94	146.221
Trondheim	15.4222	0.0993428	0	0.126958	0	0.0684504	0	61.27	76.9869
Asker	26.9137	0.675469	0	0	0	0	0	105.73	133.319
Oslo-1	38.3548	0.39603	0	0	0	0.046308	0	84.39	123.187
Oslo-2	53.6495	0.551098	0	0	0	0.1458	0	79.23	133.576
Brussels-1	22.3096	7.80317	0	0	0	0	1.62106	116.01	147.744
Brussels-2	35.435	9.18912	0	0.159144	0	0	1.95784	207.64	254.381
Brussels-3	41.5405	17.9386	0	0.168085	0	0	2.47434	82.38	144.502
Tromsø	15.7383	0.580978	0	0.18239	0	0	0	48.44	64.9416
Zurich	7.68368	3.4874	0	0.0929832	0	0.0678722	0	130.77	142.102
Copenhagen	4.12919	0.693325	0	0.137687	0	0	0	79.12	84.0802
Cologne	41.0741	17.2277	0	0.741184	0	0.33559	16.623	118.61	194.612
Seville	60.8286	1.08118	0	0	0	0.221213	0	162.46	224.591
Frankfurt	31.247	2.00367	0	0	0	0	2.39059	118.9	154.541
Vienna	42.2588	0.189327	0	0	0	0	0	127.71	170.158
London	64.2217	8.99207	0	0.144839	0	0.0980377	85.9863	192.12	351.563
Paris	104.275	3.75106	0	0.35584	0	0	4.98741	104.79	218.159
Antwerp	147.848	5.12652	0	0.130534	0	0	501.465	1934.61	2589.18
Turin-1	9.14516	0.364567	0	0	0	0	0	13.22	22.7297
Turin-2	18.9546	4.05532	0	0	0	0	0	39.38	62.3899
Sofia	152.03	0.54558	0	0	0	0	0	132.8	285.376
Nuuk-1	12.9815	0.515809	0	0	0	0.150827	0	116.47	130.118
Nuuk-2	0.226056	0.0382088	0	0	0	0.0377068	0	26.12	26.422
Marseille	72.0494	1.87659	0	0.199676	0	0.184763	2.62735	69.44	146.378

## Sheet: Table 9
Table 9. Fluorine mass balance between fractions in European tap water samples (ng F L-1).
Sample name	Fraction I			Fraction Ⅱ			All
	Target fluorinated compounds	EF	UEF	Target fluorinated compounds	EF	UEF	Target fluorinated compounds	EF	UEF
The Hague	126.3	164.16	37.86	65.79	140.9	75.11	192.03	305	112.97
Amsterdam	11.45	27.06	15.61	11.67	62.87	51.2	23.0206	89.8306	66.81
Milan	8.91	7.51	0	17.15	83.23	66.08	26.0106	92.0906	66.08
Stuttgart	16.82	26.96	10.14	9.47	56.87	47.4	26.2751	83.8151	57.54
Birmingham	35.33	64.27	28.94	6.23	31.85	25.62	40.6649	95.2249	54.56
Warsaw	21.98	36.61	14.63	23.5	58.03	34.53	45.4231	94.5831	49.16
Belgrade	13.55	20.77	7.22	7.82	63.07	55.24	21.2822	83.7422	62.46
Prague	65.49	91.2	25.72	18.45	83.15	64.7	83.9293	174.349	90.42
Leipzig	163.57	238.88	75.32	80.81	169.05	88.24	245.467	409.017	163.55
Berlin	6.94	47.35	40.41	40.06	113.05	72.99	48.6663	162.066	113.4
Stockholm	47.17	89.88	42.71	8.54	69.24	60.7	55.6809	159.091	103.41
Bremen	31.37	38.21	6.85	1.15	59.05	57.9	32.4921	97.2421	64.75
Lyon-1	129.35	106.32	0	66.36	133.3	66.93	195.591	262.521	66.93
Lyon-2	18.59	159.9	141.3	58.75	67.29	8.55	76.4173	226.267	149.85
Riga-1	18.67	52.5	33.83	3.18	70.07	66.88	21.8338	122.544	100.71
Riga-2	11.01	37.59	26.59	0	26.63	26.63	11.1721	64.3921	53.22
Madrid	109.23	49.46	0	13.78	146.38	132.61	123.073	255.683	132.61
Helsinki	44.63	44.24	0	2.53	101.47	98.94	47.2805	146.221	98.94
Trondheim	13.77	44.26	30.49	1.92	32.7	30.78	15.7169	76.9869	61.27
Asker	24.63	65.13	40.5	2.92	68.15	65.23	27.5892	133.319	105.73
Oslo-1	11.51	30.17	18.66	27.41	93.14	65.73	38.7972	123.187	84.39
Oslo-2	30.71	37.61	6.9	23.74	96.07	72.33	54.3464	133.576	79.23
Brussels-1	11.71	34.01	22.3	20.21	113.93	93.72	31.7339	147.744	116.01
Brussels-2	25.52	140.53	115.02	21.3	113.93	92.63	46.7411	254.381	207.64
Brussels-3	15.32	14.76	0	46.92	129.3	82.38	62.1215	144.502	82.38
Tromsø	5.4	9.63	4.22	11.13	55.35	44.22	16.5016	64.9416	48.44
Zurich	0.21	80.21	80	11.18	61.94	50.76	11.3319	142.102	130.77
Copenhagen	2.18	11.55	9.37	3.18	72.92	69.75	4.9602	84.0802	79.12
Cologne	15.93	45.56	29.63	55.33	144.31	88.98	76.0016	194.612	118.61
Seville	45.92	161.45	115.52	16.25	63.18	46.93	62.131	224.591	162.46
Frankfurt	29.16	131.89	102.74	5.01	21.18	16.17	35.6412	154.541	118.9
Vienna	42.09	96.14	54.05	0.44	74.1	73.66	42.4482	170.158	127.71
London	51.97	137.07	85.1	107.5	214.52	107.02	159.443	351.563	192.12
Paris	94.22	158.5	64.29	19.24	59.74	40.5	113.369	218.159	104.79
Antwerp	571.32	2482.56	1911.24	74.73	98.1	23.36	654.57	2589.18	1934.61
Turin-1	9.13	13.19	4.05	0.36	9.52	9.17	9.50973	22.7297	13.22
Turin-2	20.2	25.24	5.04	3.73	38.06	34.34	23.0099	62.3899	39.38
Sofia	146.42	262.59	116.18	5.37	21.99	16.62	152.576	285.376	132.8
Nuuk-1	11.69	94.06	82.36	1.96	36.07	34.11	13.6481	130.118	116.47
Nuuk-2	0	17.69	17.69	0.4	8.83	8.43	0.301971	26.422	26.12
Marseille	68.98	113.52	44.54	6.52	31.42	24.9	76.9377	146.378	69.44

## Sheet: Table 10
Table 10.The Sum of PFAS parameter (ng L-1) in European tap water after recovery correction.
Sample name	PFBA	PFPeA	PFHxA	PFHpA	PFOA	PFNA	PFDA	PFUnDA	PFDoDA	PFTrDA	PFBS	PFPeS	PFHxS	PFHpS	PFOS	PFNS	PFDS	Sum of 4 PFAS (PFOA、PFNA、PFHxS、PFOS)	Sum of PFAS
Lyon-2	8.53119	24.727	22.1528	5.934	15.1432	0.341191	n.d.	<LOQ	n.d.	n.d.	2.22911	0.581997	4.13696	0.188041	7.19493	n.d.	n.d.	26.8162	91.1604
Brussels-3	6.56941	5.34797	11.4296	1.74143	4.45961	n.d.	n.d.	<LOQ	n.d.	n.d.	13.8667	1.4921	8.65597	0.133303	5.06671	n.d.	n.d.	18.1823	58.7628
Cologne	4.84424	5.71643	5.73687	2.59183	2.86816	n.d.	n.d.	n.d.	n.d.	n.d.	8.418	1.55264	8.82235	0.187477	7.74406	n.d.	n.d.	19.4346	48.4821
London	6.5522	7.70191	5.97969	2.13536	3.03218	0.397208	0.191058	n.d.	n.d.	n.d.	5.05722	0.476534	3.07293	0.0792496	4.43703	n.d.	n.d.	10.9394	39.1126
Leipzig	5.67025	6.06805	4.82692	2.7419	3.2361	0.656921	0.480728	n.d.	n.d.	n.d.	1.74564	0.191395	0.521741	0.132656	6.81419	n.d.	n.d.	11.229	33.0865
Lyon-1	2.92977	4.35838	3.93904	1.78208	3.68383	0.407393	n.d.	<LOQ	n.d.	n.d.	1.48037	0.507782	4.05068	n.d.	9.0986	n.d.	n.d.	17.2405	32.2379
Brussels-2	3.50626	3.04876	5.16049	1.16617	2.05692	n.d.	n.d.	n.d.	n.d.	n.d.	5.56208	0.644493	2.89628	0.0783209	2.62122	n.d.	n.d.	7.57441	26.741
Brussels-1	4.04404	2.80874	5.52839	0.844141	1.60918	0.173142	n.d.	n.d.	n.d.	n.d.	4.73205	0.679647	3.41391	0.0629525	2.6505	n.d.	n.d.	7.84674	26.5467
Seville	5.3648	12.4477	3.06097	1.69141	1.01959	0.478686	0.160243	n.d.	n.d.	n.d.	<LOQ	n.d.	n.d.	n.d.	1.38627	n.d.	n.d.	2.88455	25.6097
The Hague	5.3691	4.73316	4.12545	1.86024	3.38682	0.351376	0.197222	n.d.	n.d.	n.d.	3.4656	0.152335	0.780558	0.0567583	1.11292	n.d.	n.d.	5.63167	25.5915
Antwerp	6.93079	7.34398	0	2.70125	2.35393	0.371746	n.d.	n.d.	n.d.	n.d.	2.22483	0.140617	0.649095	<LOQ	0.986007	n.d.	n.d.	4.36078	23.7022
Milan	4.99912	3.81937	3.48774	1.68828	3.84342	0.310637	n.d.	<LOQ	n.d.	n.d.	2.40453	0.273421	0.936669	0.0928044	1.63033	n.d.	n.d.	6.72106	23.4863
Prague	16.8903	0.97274	0.956554	0.569014	0.718148	0.336099	n.d.	n.d.	n.d.	n.d.	n.d.	n.d.	0.156112	n.d.	0.385617	n.d.	n.d.	1.59598	20.9846
Berlin	2.58847	2.19393	2.62766	0.725336	3.20655	n.d.	0.354383	0.149011	n.d.	n.d.	2.22483	0.214831	1.19959	0.108257	3.69509	n.d.	n.d.	8.10123	19.2879
Amsterdam	4.65924	1.96232	1.47653	0.731589	3.38239	n.d.	n.d.	n.d.	n.d.	n.d.	2.59706	0.0976504	0.373846	<LOQ	0.156199	n.d.	n.d.	3.91243	15.4368
Paris	3.01152	3.78569	3.01682	1.05049	0.616189	n.d.	n.d.	<LOQ	n.d.	n.d.	0.821477	0.191395	0.916128	n.d.	1.75236	n.d.	n.d.	3.28468	15.1621
Warsaw	2.74048	3.88675	1.76595	1.14428	1.24124	n.d.	n.d.	<LOQ	n.d.	n.d.	1.39052	n.d.	0.653203	n.d.	n.d.	n.d.	n.d.	1.89445	12.8224
Stockholm	3.01152	n.d.	2.03084	0.694072	0.992995	0.417577	n.d.	n.d.	n.d.	n.d.	1.36913	0.312481	1.12975	0.0879234	2.03059	n.d.	n.d.	4.57092	12.0769
Stuttgart	3.06314	1.19592	1.452	0.525243	0.877736	0.290267	0.123264	<LOQ	n.d.	n.d.	0.791527	0.0820264	0.566931	0.0708915	3.00683	n.d.	n.d.	4.74177	12.0458
Zurich	0.967987	0.917997	1.10372	0.262622	0.545261	n.d.	n.d.	n.d.	n.d.	n.d.	2.34891	0.257797	1.23657	<LOQ	1.47413	n.d.	n.d.	3.25596	9.11499
Belgrade	4.80122	0.572696	0.721095	n.d.	0.239383	n.d.	n.d.	n.d.	<LOQ	n.d.	0.577601	n.d.	0.349197	n.d.	1.33746	n.d.	n.d.	1.92604	8.59864
Oslo-2	5.23573	n.d.	0.505257	0.234484	0.359074	0.305544	n.d.	<LOQ	n.d.	n.d.	<LOQ	n.d.	0.147895	<LOQ	0.27823	n.d.	n.d.	1.09074	7.06622
Madrid	3.43313	n.d.	0.936932	0.631543	0.775777	n.d.	n.d.	n.d.	n.d.	n.d.	0.453524	n.d.	0.201302	n.d.	0.453954	n.d.	n.d.	1.43103	6.88616
Oslo-1	4.02683	n.d.	1.14786	0.515864	0.41227	0.249528	n.d.	n.d.	n.d.	n.d.	<LOQ	0.124993	0.271141	0.0894962	n.d.	n.d.	n.d.	0.932939	6.83798
Helsinki	3.31267	1.02748	0.603365	0.353289	0.341342	n.d.	n.d.	n.d.	n.d.	n.d.	<LOQ	n.d.	n.d.	n.d.	n.d.	n.d.	n.d.	0.341342	5.63815
Turin-2	0.546375	0.416889	0.470919	n.d.	0.292579	n.d.	n.d.	n.d.	0.285712	n.d.	0.658893	0.0703083	0.230059	n.d.	1.20566	n.d.	n.d.	1.7283	4.1774
Frankfurt	1.20461	n.d.	0.652419	0.18446	0.536394	n.d.	n.d.	n.d.	n.d.	n.d.	0.954111	0.105462	0.505308	<LOQ	n.d.	n.d.	n.d.	1.0417	4.14276
Birmingham	1.14868	n.d.	0.740716	0.256369	0.36794	0.285175	n.d.	0.180234	n.d.	n.d.	0.389346	n.d.	0.258816	n.d.	n.d.	n.d.	n.d.	0.911931	3.62727
Marseille	n.d.	n.d.	1.17566	0.264706	0.301445	n.d.	n.d.	n.d.	n.d.	n.d.	0.179698	0.0703083	0.351936	n.d.	0.719167	n.d.	n.d.	1.37255	3.06292
Nuuk-1	0.804505	n.d.	0.534689	0.231357	0.421136	n.d.	n.d.	n.d.	n.d.	n.d.	0.188255	0.0624963	0.431361	n.d.	0.195249	n.d.	n.d.	1.04775	2.86905
Asker	n.d.	n.d.	0	0.472094	0.642787	n.d.	n.d.	n.d.	n.d.	n.d.	n.d.	n.d.	0.131462	n.d.	1.08851	n.d.	n.d.	1.86276	2.33486
Trondheim	1.23042	n.d.	0	0.165702	0.310311	0.346284	n.d.	n.d.	n.d.	n.d.	n.d.	n.d.	0.16022	n.d.	<LOQ	n.d.	n.d.	0.816814	2.21294
Copenhagen	n.d.	n.d.	0.622986	n.d.	0.585158	n.d.	n.d.	n.d.	n.d.	n.d.	n.d.	n.d.	0.139679	n.d.	0.737065	n.d.	n.d.	1.4619	2.08489
Riga-1	n.d.	n.d.	0.745622	0.606531	n.d.	0.381931	n.d.	n.d.	n.d.	n.d.	0.179698	n.d.	n.d.	n.d.	n.d.	n.d.	n.d.	0.381931	1.91378
Bremen	0.202202	n.d.	0.485635	n.d.	n.d.	n.d.	n.d.	<LOQ	n.d.	n.d.	0.654614	0.0742143	0.242384	<LOQ	0.102506	n.d.	n.d.	0.344889	1.76155
Tromsø	n.d.	n.d.	0	0.168828	0.208352	n.d.	n.d.	n.d.	n.d.	n.d.	n.d.	n.d.	0.082164	n.d.	0.971364	n.d.	n.d.	1.26188	1.43071
Sofia	n.d.	n.d.	0	0.337656	n.d.	0.346284	n.d.	n.d.	n.d.	n.d.	0.226762	n.d.	0.0985967	n.d.	n.d.	n.d.	n.d.	0.44488	1.0093
Turin-1	0.154878	n.d.	0	n.d.	n.d.	n.d.	n.d.	n.d.	0.402807	n.d.	n.d.	n.d.	0.147895	n.d.	0.219655	n.d.	n.d.	0.36755	0.925235
Vienna	0.395799	n.d.	0	0.143817	n.d.	n.d.	n.d.	n.d.	n.d.	n.d.	<LOQ	n.d.	0.0862722	n.d.	n.d.	n.d.	n.d.	0.0862722	0.625888
Nuuk-2	0.249526	n.d.	0	0.090667	n.d.	n.d.	n.d.	<LOQ	n.d.	n.d.	<LOQ	n.d.	0.061623	n.d.	<LOQ	n.d.	n.d.	0.061623	0.401816
Riga-2	n.d.	n.d.	n.d.	n.d.	n.d.	n.d.	n.d.	n.d.	n.d.	n.d.	n.d.	n.d.	n.d.	n.d.	n.d.	n.d.	n.d.	0	0

## Sheet: Table 11
Table 11. the PFAS Total parameter (ng L-1) in European tap water after recovery correction.
Sample name	TFA	PFPrA	PFBA	PFPeA	PFHxA	FHpPA	PFOA	PFNA	PFDA	PFUnDA	PFDoDA	PFTrDA	PFTeDA	PFPeDA	TFMS	PFEtS	PFPrS	PFBS	PFPeS	PFHxS	PFHpS	PFOS	PFNS	PFDS	FOSAA	FOSA	MeFOSAA	EtFOSAA	4:2 FTS	6:2 FTS	8:2 FTS	9Cl-PF3ONS	11Cl-PF3OUdS	ADONA	FPrPA	FPePA	PFHpA	HFPO-DA	BF4-	PF6-
PFAS category	PFCA	PFCA	PFCA	PFCA	PFCA	PFCA	PFCA	PFCA	PFCA	PFCA	PFCA	PFCA	PFCA	PFCA	PFSA	PFSA	PFSA	PFSA	PFSA	PFSA	PFSA	PFSA	PFSA	PFSA	FOSA	FOSA	FOSA	FOSA	FTSA	FTSA	FTSA	fluorinated alternatives	fluorinated alternatives	fluorinated alternatives	fluorinated alternatives	FTCA	FTCA	FTCA	inorganic fluorine	inorganic fluorine	TFA	PFCAs excluding TFA	PFSAs	FOSAs	FTSAs	Fluorinated Alternatives	FTCA	∑BF4-+PF6-	UEF
Recoveries	0.278648	1.13355	0.956447	0.957168	0.838828	1.24866	0.928216	0.808025	0.667641	0.515554	0.318901	0.313435	0.231829	/	0.303011	/	1.17345	0.953911	1.04488	1.00161	1.31596	0.842983	/	0.550376	0.670444	0.0728942	0.4676	0.377212	0.717082	0.873599	0.439652	0.906542	0.55977	0.666273	0.505932	0.0891257	0.048382	0.991363	0.375074	0.795979
Antwerp	961.361	n.d.	6.93079	7.34398	n.d.	2.70125	2.35393	0.371746	n.d.	n.d.	n.d.	n.d.	n.d.	n.d.	24.4197	0.0542406	0.0730392	2.22483	0.140617	0.649095	<LOQ	0.986007	n.d.	n.d.	n.d.	n.d.	n.d.	n.d.	<LOQ	0.258432	n.d.	n.d.	<LOQ	n.d.	n.d.	n.d.	n.d.	n.d.	1493.99	17.3044	961.361	19.7017	28.5476	0	0.258432	0	0	1511.3	3006.99
Sofia	1078.2	n.d.	n.d.	n.d.	n.d.	0.337656	n.d.	0.346284	n.d.	n.d.	n.d.	n.d.	n.d.	n.d.	3.08445	0.0220895	n.d.	0.226762	n.d.	0.0985967	n.d.	n.d.	n.d.	n.d.	n.d.	n.d.	n.d.	n.d.	n.d.	n.d.	n.d.	n.d.	<LOQ	n.d.	n.d.	n.d.	n.d.	n.d.	n.d.	n.d.	1078.2	0.68394	3.4319	0	0	0	0	0	206.089
Leipzig	821.054	n.d.	5.67025	6.06805	4.82692	2.7419	3.2361	0.656921	0.480728	n.d.	n.d.	n.d.	n.d.	n.d.	4.16199	0.025834	0.10782	1.74564	0.191395	0.521741	0.132656	6.81419	n.d.	n.d.	n.d.	n.d.	n.d.	n.d.	n.d.	n.d.	n.d.	n.d.	n.d.	n.d.	n.d.	n.d.	n.d.	n.d.	184.688	77.9257	821.054	23.6809	13.7013	0	0	0	0	262.613	253.64
Madrid	800.8	4.80975	3.43313	n.d.	0.936932	0.631543	0.775777	n.d.	n.d.	n.d.	n.d.	n.d.	n.d.	n.d.	2.06079	0.0411755	n.d.	0.453524	n.d.	0.201302	n.d.	0.453954	n.d.	n.d.	n.d.	n.d.	n.d.	n.d.	n.d.	n.d.	n.d.	n.d.	n.d.	n.d.	n.d.	n.d.	n.d.	n.d.	n.d.	4.57566	800.8	10.5871	3.21075	0	0	0	0	4.57566	113.613
Paris	655.625	7.55404	3.01152	3.78569	3.01682	1.05049	0.616189	n.d.	n.d.	<LOQ	n.d.	n.d.	n.d.	n.d.	13.8598	n.d.	0.0834734	0.821477	0.191395	0.916128	n.d.	1.75236	n.d.	n.d.	n.d.	n.d.	n.d.	n.d.	<LOQ	0.704493	<LOQ	n.d.	n.d.	n.d.	n.d.	n.d.	n.d.	n.d.	5.31974	5.17794	655.625	19.0347	17.6247	0	0.704493	0	0	10.4977	163.732
London	278.948	13.4528	6.5522	7.70191	5.97969	2.13536	3.03218	0.397208	0.191058	n.d.	n.d.	n.d.	n.d.	n.d.	12.3648	n.d.	0.173903	5.05722	0.476534	3.07293	0.0792496	4.43703	n.d.	n.d.	n.d.	n.d.	n.d.	n.d.	n.d.	0.286754	<LOQ	n.d.	<LOQ	n.d.	n.d.	1.80057	n.d.	n.d.	4.74575	134.911	278.948	39.4424	25.6616	0	0.286754	0	1.80057	139.657	299.979
Marseille	504.939	<LOQ	n.d.	n.d.	1.17566	0.264706	0.301445	n.d.	n.d.	n.d.	n.d.	n.d.	n.d.	n.d.	9.67091	0.0200871	n.d.	0.179698	0.0703083	0.351936	n.d.	0.719167	n.d.	n.d.	n.d.	n.d.	n.d.	n.d.	n.d.	0.395319	n.d.	n.d.	<LOQ	n.d.	n.d.	3.39338	n.d.	n.d.	8.00032	<LOQ	504.939	1.74181	11.0121	0	0.395319	0	3.39338	8.00032	106.171
Prague	447.627	5.26713	16.8903	0.97274	0.956554	0.569014	0.718148	0.336099	n.d.	n.d.	n.d.	n.d.	n.d.	n.d.	5.89952	n.d.	n.d.	n.d.	n.d.	0.156112	n.d.	0.385617	n.d.	n.d.	n.d.	n.d.	n.d.	n.d.	n.d.	n.d.	n.d.	n.d.	n.d.	<LOQ	n.d.	3.5088	n.d.	n.d.	n.d.	6.37414	447.627	25.71	6.44125	0	0	0	3.5088	6.37414	141.17
Seville	284.608	8.66482	5.3648	12.4477	3.06097	1.69141	1.01959	0.478686	0.160243	n.d.	n.d.	n.d.	n.d.	n.d.	2.8016	n.d.	n.d.	<LOQ	n.d.	n.d.	n.d.	1.38627	n.d.	n.d.	n.d.	n.d.	n.d.	n.d.	n.d.	n.d.	n.d.	n.d.	n.d.	n.d.	n.d.	4.06282	n.d.	n.d.	n.d.	n.d.	284.608	32.8882	4.18787	0	0	0	4.06282	0	253.695
Brussels-2	155.241	6.69736	3.50626	3.04876	5.16049	1.16617	2.05692	n.d.	n.d.	n.d.	n.d.	n.d.	n.d.	n.d.	15.9745	n.d.	0.970378	5.56208	0.644493	2.89628	0.0783209	2.62122	n.d.	n.d.	n.d.	n.d.	n.d.	n.d.	n.d.	0.315075	n.d.	n.d.	n.d.	<LOQ	n.d.	n.d.	n.d.	n.d.	n.d.	3.12851	155.241	21.636	28.7473	0	0.315075	0	0	3.12851	324.289
Vienna	296.736	0.2904	0.395799	n.d.	n.d.	0.143817	n.d.	n.d.	n.d.	n.d.	n.d.	n.d.	n.d.	n.d.	1.17182	n.d.	n.d.	<LOQ	n.d.	0.0862722	n.d.	n.d.	n.d.	n.d.	n.d.	n.d.	n.d.	n.d.	n.d.	n.d.	n.d.	n.d.	n.d.	n.d.	n.d.	n.d.	n.d.	n.d.	n.d.	n.d.	296.736	0.830016	1.2581	0	0	0	0	0	199.509
Oslo-2	343.632	2.02554	5.23573	n.d.	0.505257	0.234484	0.359074	0.305544	n.d.	<LOQ	n.d.	n.d.	n.d.	n.d.	2.65344	n.d.	n.d.	<LOQ	n.d.	0.147895	<LOQ	0.27823	n.d.	n.d.	n.d.	n.d.	n.d.	n.d.	n.d.	n.d.	n.d.	n.d.	n.d.	n.d.	n.d.	2.67777	n.d.	n.d.	n.d.	n.d.	343.632	8.66564	3.07956	0	0	0	2.67777	0	123.864
The Hague	210.222	5.64465	5.3691	4.73316	4.12545	1.86024	3.38682	0.351376	0.197222	n.d.	n.d.	n.d.	n.d.	n.d.	60.221	n.d.	0.139122	3.4656	0.152335	0.780558	0.0567583	1.11292	n.d.	n.d.	n.d.	n.d.	n.d.	n.d.	n.d.	n.d.	n.d.	n.d.	n.d.	<LOQ	n.d.	1.56973	n.d.	n.d.	360.369	28.1622	210.222	25.668	65.9282	0	0	0	1.56973	388.531	176.451
Helsinki	310.482	<LOQ	3.31267	1.02748	0.603365	0.353289	0.341342	n.d.	n.d.	n.d.	n.d.	n.d.	n.d.	n.d.	1.42774	n.d.	n.d.	<LOQ	n.d.	n.d.	n.d.	n.d.	n.d.	n.d.	n.d.	n.d.	n.d.	n.d.	n.d.	n.d.	n.d.	n.d.	<LOQ	n.d.	n.d.	n.d.	n.d.	n.d.	n.d.	<LOQ	310.482	5.63815	1.42774	0	0	0	0	0	153.673
Stockholm	287.034	4.22532	3.01152	n.d.	2.03084	0.694072	0.992995	0.417577	n.d.	n.d.	n.d.	n.d.	n.d.	n.d.	2.50528	0.0201769	n.d.	1.36913	0.312481	1.12975	0.0879234	2.03059	n.d.	n.d.	n.d.	n.d.	n.d.	n.d.	n.d.	<LOQ	n.d.	n.d.	<LOQ	n.d.	n.d.	n.d.	n.d.	n.d.	10.4915	2.53181	287.034	11.3723	7.45533	0	0	0	0	13.0233	161.485
Lyon-1	313.239	6.28354	2.92977	4.35838	3.93904	1.78208	3.68383	0.407393	n.d.	<LOQ	n.d.	n.d.	n.d.	n.d.	n.d.	n.d.	0.177381	1.48037	0.507782	4.05068	n.d.	9.0986	n.d.	n.d.	n.d.	n.d.	n.d.	n.d.	n.d.	0.389418	n.d.	n.d.	n.d.	<LOQ	n.d.	n.d.	n.d.	n.d.	373.979	7.85196	313.239	23.384	15.3148	0	0.389418	0	0	381.831	68.7352
Lyon-2	74.087	5.41959	8.53119	24.727	22.1528	5.934	15.1432	0.341191	n.d.	<LOQ	n.d.	n.d.	n.d.	n.d.	5.9534	n.d.	0.420845	2.22911	0.581997	4.13696	0.188041	7.19493	n.d.	n.d.	n.d.	n.d.	n.d.	<LOQ	0.138012	5.09076	<LOQ	n.d.	n.d.	n.d.	n.d.	n.d.	n.d.	n.d.	8.50329	n.d.	74.087	82.2489	20.7053	0	5.22877	0	0	8.50329	235.386
Cologne	164.131	6.51041	4.84424	5.71643	5.73687	2.59183	2.86816	n.d.	n.d.	n.d.	n.d.	n.d.	n.d.	n.d.	11.8462	n.d.	0.699089	8.418	1.55264	8.82235	0.187477	7.74406	n.d.	n.d.	n.d.	<LOQ	n.d.	n.d.	<LOQ	1.4674	<LOQ	n.d.	n.d.	n.d.	n.d.	6.16348	n.d.	n.d.	20.344	15.8866	164.131	28.2679	39.2698	0	1.4674	0	6.16348	36.2305	169.727
Frankfurt	211.03	n.d.	1.20461	n.d.	0.652419	0.18446	0.536394	n.d.	n.d.	n.d.	n.d.	n.d.	n.d.	n.d.	9.52275	n.d.	n.d.	0.954111	0.105462	0.505308	<LOQ	n.d.	n.d.	n.d.	n.d.	n.d.	n.d.	n.d.	n.d.	n.d.	n.d.	n.d.	n.d.	n.d.	n.d.	n.d.	n.d.	n.d.	n.d.	3.82002	211.03	2.57788	11.0876	0	0	0	0	3.82002	183.327
Oslo-1	216.634	6.07663	4.02683	n.d.	1.14786	0.515864	0.41227	0.249528	n.d.	n.d.	n.d.	n.d.	n.d.	n.d.	0.646523	n.d.	n.d.	<LOQ	0.124993	0.271141	0.0894962	n.d.	n.d.	n.d.	n.d.	n.d.	n.d.	n.d.	n.d.	<LOQ	n.d.	n.d.	n.d.	n.d.	n.d.	n.d.	1.48483	n.d.	n.d.	n.d.	216.634	12.429	1.13215	0	0	0	1.48483	0	131.943
Asker	163.617	4.69722	n.d.	n.d.	n.d.	0.472094	0.642787	n.d.	n.d.	n.d.	n.d.	n.d.	n.d.	n.d.	n.d.	n.d.	n.d.	n.d.	n.d.	0.131462	n.d.	1.08851	n.d.	n.d.	n.d.	n.d.	n.d.	n.d.	n.d.	n.d.	n.d.	n.d.	n.d.	n.d.	n.d.	n.d.	n.d.	n.d.	n.d.	n.d.	163.617	5.8121	1.21998	0	0	0	0	0	164.999
Bremen	221.541	n.d.	0.202202	n.d.	0.485635	n.d.	n.d.	n.d.	n.d.	n.d.	n.d.	n.d.	n.d.	n.d.	1.14488	n.d.	n.d.	0.654614	0.0742143	0.242384	<LOQ	0.102506	n.d.	n.d.	n.d.	n.d.	n.d.	n.d.	n.d.	0.336316	n.d.	n.d.	<LOQ	n.d.	n.d.	0.8772	n.d.	n.d.	n.d.	n.d.	221.541	0.687837	2.2186	0	0.336316	0	0.8772	0	101.118
Birmingham	226.603	1.0164	1.14868	n.d.	0.740716	0.256369	0.36794	0.285175	n.d.	0.180234	n.d.	n.d.	n.d.	n.d.	1.71059	n.d.	n.d.	0.389346	n.d.	0.258816	n.d.	n.d.	n.d.	n.d.	n.d.	n.d.	n.d.	n.d.	n.d.	<LOQ	n.d.	n.d.	n.d.	n.d.	n.d.	3.41646	n.d.	n.d.	17.0658	<LOQ	226.603	3.99551	2.35876	0	0	0	3.41646	17.0658	86.5804
Brussels-3	113.706	11.4563	6.56941	5.34797	11.4296	1.74143	4.45961	n.d.	n.d.	<LOQ	n.d.	n.d.	n.d.	n.d.	n.d.	0.151515	1.87467	13.8667	1.4921	8.65597	0.133303	5.06671	n.d.	n.d.	n.d.	n.d.	n.d.	n.d.	n.d.	0.332776	n.d.	n.d.	<LOQ	<LOQ	n.d.	n.d.	n.d.	n.d.	n.d.	3.95386	113.706	41.0043	31.241	0	0.332776	0	0	3.95386	127.923
Riga-1	120.473	5.28528	n.d.	n.d.	0.745622	0.606531	n.d.	0.381931	n.d.	n.d.	n.d.	n.d.	n.d.	n.d.	1.4008	n.d.	n.d.	0.179698	n.d.	n.d.	n.d.	n.d.	n.d.	n.d.	n.d.	n.d.	n.d.	n.d.	n.d.	n.d.	n.d.	n.d.	n.d.	n.d.	n.d.	n.d.	n.d.	n.d.	n.d.	n.d.	120.473	7.01937	1.5805	0	0	0	0	0	157.27
Brussels-1	62.2418	6.74455	4.04404	2.80874	5.52839	0.844141	1.60918	0.173142	n.d.	n.d.	n.d.	n.d.	n.d.	n.d.	4.33709	n.d.	1.08168	4.73205	0.679647	3.41391	0.0629525	2.6505	n.d.	n.d.	n.d.	n.d.	n.d.	n.d.	n.d.	<LOQ	n.d.	n.d.	n.d.	<LOQ	n.d.	n.d.	n.d.	n.d.	n.d.	2.59037	62.2418	21.7522	16.9578	0	0	0	0	2.59037	181.414
Nuuk-1	83.4904	<LOQ	0.804505	n.d.	0.534689	0.231357	0.421136	n.d.	n.d.	n.d.	n.d.	n.d.	n.d.	n.d.	n.d.	n.d.	<LOQ	0.188255	0.0624963	0.431361	n.d.	0.195249	n.d.	n.d.	n.d.	n.d.	n.d.	n.d.	n.d.	n.d.	n.d.	n.d.	<LOQ	n.d.	n.d.	2.7701	n.d.	n.d.	n.d.	n.d.	83.4904	1.99169	0.877361	0	0	0	2.7701	0	181.844
Zurich	38.0178	<LOQ	0.967987	0.917997	1.10372	0.262622	0.545261	n.d.	n.d.	n.d.	n.d.	n.d.	n.d.	n.d.	3.59629	n.d.	0.0904295	2.34891	0.257797	1.23657	<LOQ	1.47413	n.d.	n.d.	n.d.	n.d.	n.d.	n.d.	n.d.	0.184089	n.d.	n.d.	n.d.	n.d.	n.d.	1.24655	n.d.	n.d.	n.d.	n.d.	38.0178	3.79758	9.00412	0	0.184089	0	1.24655	0	204.238
Berlin	31.2705	n.d.	2.58847	2.19393	2.62766	0.725336	3.20655	n.d.	0.354383	0.149011	n.d.	n.d.	n.d.	n.d.	8.49909	0.0678849	n.d.	2.22483	0.214831	1.19959	0.108257	3.69509	n.d.	n.d.	n.d.	<LOQ	n.d.	0.231082	n.d.	<LOQ	<LOQ	n.d.	<LOQ	n.d.	n.d.	n.d.	n.d.	n.d.	5.94698	47.622	31.2705	11.8453	16.0096	0.231082	0	0	0	53.569	174.431
Turin-2	125.325	0.35937	0.546375	0.416889	0.470919	n.d.	0.292579	n.d.	n.d.	n.d.	0.285712	n.d.	n.d.	n.d.	24.2177	0.0184933	0.0660831	0.658893	0.0703083	0.230059	n.d.	1.20566	n.d.	n.d.	n.d.	n.d.	n.d.	n.d.	n.d.	n.d.	n.d.	n.d.	n.d.	n.d.	n.d.	<LOQ	n.d.	n.d.	n.d.	<LOQ	125.325	2.37184	26.4672	0	0	0	0	0	62.9013
Stuttgart	70.8367	5.07837	3.06314	1.19592	1.452	0.525243	0.877736	0.290267	0.123264	<LOQ	n.d.	n.d.	n.d.	n.d.	12.9843	n.d.	n.d.	0.791527	0.0820264	0.566931	0.0708915	3.00683	n.d.	n.d.	n.d.	n.d.	n.d.	n.d.	<LOQ	0.513324	n.d.	n.d.	<LOQ	n.d.	n.d.	n.d.	n.d.	n.d.	6.11858	3.25678	70.8367	12.6059	17.5026	0	0.513324	0	0	9.37536	89.8433
Trondheim	80.0784	4.38504	1.23042	n.d.	n.d.	0.165702	0.310311	0.346284	n.d.	n.d.	n.d.	n.d.	n.d.	n.d.	n.d.	n.d.	n.d.	n.d.	n.d.	0.16022	n.d.	<LOQ	n.d.	n.d.	n.d.	n.d.	n.d.	n.d.	n.d.	0.251352	n.d.	n.d.	n.d.	n.d.	n.d.	n.d.	2.19481	n.d.	n.d.	n.d.	80.0784	6.43776	0.16022	0	0.251352	0	2.19481	0	95.6199
Milan	29.7545	3.58281	4.99912	3.81937	3.48774	1.68828	3.84342	0.310637	n.d.	<LOQ	n.d.	n.d.	n.d.	n.d.	19.49	n.d.	0.201727	2.40453	0.273421	0.936669	0.0928044	1.63033	n.d.	n.d.	n.d.	n.d.	n.d.	n.d.	n.d.	n.d.	n.d.	n.d.	<LOQ	n.d.	n.d.	n.d.	n.d.	n.d.	n.d.	4.24664	29.7545	21.7314	25.0295	0	0	0	0	4.24664	101.048
Belgrade	70.206	<LOQ	4.80122	0.572696	0.721095	n.d.	0.239383	n.d.	n.d.	n.d.	<LOQ	n.d.	n.d.	n.d.	4.12159	0.035882	n.d.	0.577601	n.d.	0.349197	n.d.	1.33746	n.d.	n.d.	n.d.	n.d.	n.d.	n.d.	n.d.	0.265513	<LOQ	n.d.	n.d.	n.d.	n.d.	n.d.	n.d.	n.d.	10.4087	3.73358	70.206	6.33439	6.42172	0	0.265513	0	0	14.1423	93.507
Amsterdam	33.781	3.32871	4.65924	1.96232	1.47653	0.731589	3.38239	n.d.	n.d.	n.d.	n.d.	n.d.	n.d.	n.d.	14.5872	n.d.	0.0834734	2.59706	0.0976504	0.373846	<LOQ	0.156199	n.d.	n.d.	n.d.	n.d.	n.d.	n.d.	n.d.	n.d.	n.d.	n.d.	<LOQ	<LOQ	n.d.	3.09328	n.d.	n.d.	9.67494	2.5095	33.781	15.5408	17.8954	0	0	0	3.09328	12.1844	104.463
Tromsø	84.0321	5.52486	n.d.	n.d.	n.d.	0.168828	0.208352	n.d.	n.d.	n.d.	n.d.	n.d.	n.d.	n.d.	n.d.	n.d.	n.d.	n.d.	n.d.	0.082164	n.d.	0.971364	n.d.	n.d.	n.d.	n.d.	n.d.	n.d.	n.d.	0.361097	n.d.	n.d.	n.d.	n.d.	n.d.	n.d.	n.d.	n.d.	n.d.	n.d.	84.0321	5.90204	1.05353	0	0.361097	0	0	0	75.6784
Riga-2	78.1783	<LOQ	n.d.	n.d.	n.d.	n.d.	n.d.	n.d.	n.d.	n.d.	n.d.	n.d.	n.d.	n.d.	1.11795	n.d.	n.d.	n.d.	n.d.	n.d.	n.d.	<LOQ	n.d.	n.d.	n.d.	n.d.	n.d.	n.d.	n.d.	n.d.	n.d.	n.d.	0.160653	n.d.	n.d.	n.d.	n.d.	n.d.	n.d.	n.d.	78.1783	0	1.11795	0	0	0.160653	0	0	82.8316
Copenhagen	<LOQ	5.1546	n.d.	n.d.	0.622986	n.d.	0.585158	n.d.	n.d.	n.d.	n.d.	n.d.	n.d.	n.d.	1.76447	n.d.	n.d.	n.d.	n.d.	0.139679	n.d.	0.737065	n.d.	n.d.	n.d.	n.d.	n.d.	n.d.	n.d.	0.272593	n.d.	n.d.	n.d.	n.d.	n.d.	n.d.	n.d.	n.d.	n.d.	<LOQ	<LOQ	6.36275	2.64121	0	0.272593	0	0	0	124.136
Warsaw	35.1313	2.35224	2.74048	3.88675	1.76595	1.14428	1.24124	n.d.	n.d.	<LOQ	n.d.	n.d.	n.d.	n.d.	5.75136	n.d.	n.d.	1.39052	n.d.	0.653203	n.d.	n.d.	n.d.	n.d.	n.d.	n.d.	n.d.	n.d.	n.d.	n.d.	n.d.	n.d.	n.d.	n.d.	n.d.	n.d.	n.d.	n.d.	60.2805	16.7663	35.1313	13.1309	7.79509	0	0	0	0	77.0468	76.8292
Turin-1	62.2014	0.33033	0.154878	n.d.	n.d.	n.d.	n.d.	n.d.	n.d.	n.d.	0.402807	n.d.	n.d.	n.d.	1.31999	n.d.	n.d.	n.d.	n.d.	0.147895	n.d.	0.219655	n.d.	n.d.	n.d.	n.d.	n.d.	n.d.	n.d.	n.d.	n.d.	n.d.	<LOQ	n.d.	n.d.	<LOQ	n.d.	n.d.	n.d.	n.d.	62.2014	0.888015	1.68754	0	0	0	0	0	20.604
Nuuk-2	<LOQ	<LOQ	0.249526	n.d.	n.d.	0.090667	n.d.	n.d.	n.d.	<LOQ	n.d.	n.d.	n.d.	n.d.	n.d.	n.d.	n.d.	<LOQ	n.d.	0.061623	n.d.	<LOQ	n.d.	n.d.	n.d.	n.d.	n.d.	n.d.	n.d.	n.d.	n.d.	n.d.	<LOQ	n.d.	n.d.	0.692526	n.d.	n.d.	n.d.	n.d.	<LOQ	0.340193	0.061623	0	0	0	0.692526	0	40.936
Min	29.75	0.29	0.15	0.42	0.47	0.09	0.21	0.17	0.12	0.15	0.29				0.65	0.02	0.07	0.18	0.06	0.06	0.06	0.1						0.23	0.14	0.18			0.16			0.69	1.48		4.75	2.51	29.75	0	0.06	0	0	0	0	0	20.6
Max	1078	13.45	16.89	24.73	22.15	5.93	15.14	0.66	0.48	0.18	0.4				60.22	0.15	1.87	13.87	1.55	8.82	0.19	9.1						0.23	0.14	5.09			0.16			6.16	2.19		1494	134.9	1078	82.25	65.93	0.23	5.23	0.16	6.16	1511	3007
Median	164.1	5.21	3.37	3.805	1.465	0.63	0.83	0.35	0.195	0.165	0.345				4.25	0.035	0.17	1.435	0.19	0.43	0.09	1.365						0.23	0.14	0.335			0.16			2.77	1.835		10.45	4.88	164.1	10.59	7.46	0	0	0	0	3.82	141.2
[truncated: 3 more columns]

## Sheet: Table 12
Table 12. Potency-weighted concentrations of individual PFAS expressed as PFOA-equivalents (ng L-1PFOA-eq) in European tap water after recovery correction.
Sample name	TFA	PFPrA	PFBA	PFPeA	PFHxA	PFHpA	PFOA	PFNA	PFDA	PFUnDA	PFDoDA	PFBS	PFPeS	PFHxS	PFHpS	PFOS	EtFOSAA	4:2 FTS	6:2 FTS	HFPO-DA	ΣPEQ	RQ PEQ
Relative Potency Factors (RPFs)	0.002	0.01	0.05	0.05	0.01	1	1	10	10	4	3	0.001	0.6	0.6	2	2	2	0.05	1	0.06
Lyon-2	0.148174	0.0541959	0.42656	1.23635	0.221528	5.934	15.1432	3.41191	0	0	0	0.00222911	0.349198	2.48217	0.376083	14.3899	0	0.0069006	5.09076	0	49.2731	11.1984
Leipzig	1.64211	0	0.283513	0.303402	0.0482692	2.7419	3.2361	6.56921	4.80728	0	0	0.00174564	0.114837	0.313045	0.265312	13.6284	0	0	0	0	33.9551	7.71707
Lyon-1	0.626477	0.0628354	0.146489	0.217919	0.0393904	1.78208	3.68383	4.07393	0	0	0	0.00148037	0.304669	2.43041	0	18.1972	0	0	0.389418	0	31.9561	7.26276
Cologne	0.328261	0.0651041	0.242212	0.285821	0.0573687	2.59183	2.86816	0	0	0	0	0.008418	0.931585	5.29341	0.374954	15.4881	0	0	1.4674	0	30.0026	6.81878
Brussels-3	0.227412	0.114563	0.32847	0.267398	0.114296	1.74143	4.45961	0	0	0	0	0.0138667	0.895259	5.19358	0.266606	10.1334	0	0	0.332776	0	24.0887	5.4747
London	0.557896	0.134528	0.32761	0.385096	0.0597969	2.13536	3.03218	3.97208	1.91058	0	0	0.00505722	0.28592	1.84376	0.158499	8.87407	0	0	0.286754	0	23.9692	5.44754
Berlin	0.062541	0	0.129423	0.109696	0.0262766	0.725336	3.20655	0	3.54383	0.596044	0	0.00222483	0.128899	0.719756	0.216514	7.39017	0.462164	0	0	0	17.3194	3.93623
The Hague	0.420444	0.0564465	0.268455	0.236658	0.0412545	1.86024	3.38682	3.51376	1.97222	0	0	0.0034656	0.0914008	0.468335	0.113517	2.22584	0	0	0	0	14.6588	3.33156
Antwerp	1.92272	0	0.346539	0.367199	0	2.70125	2.35393	3.71746	0	0	0	0.00222483	0.08437	0.389457	0	1.97201	0	0	0.258432	0	14.1156	3.20809
Seville	0.569216	0.0866482	0.26824	0.622385	0.0306097	1.69141	1.01959	4.78686	1.60243	0	0	0	0	0	0	2.77254	0	0	0	0	13.4499	3.0568
Milan	0.059509	0.0358281	0.249956	0.190969	0.0348774	1.68828	3.84342	3.10637	0	0	0	0.00240453	0.164053	0.562001	0.185609	3.26066	0	0	0	0	13.3839	3.0418
Stuttgart	0.141673	0.0507837	0.153157	0.0597962	0.01452	0.525243	0.877736	2.90267	1.23264	0	0	0.000791527	0.0492158	0.340159	0.141783	6.01367	0	0	0.513324	0	13.0172	2.95845
Brussels-1	0.124484	0.0674455	0.202202	0.140437	0.0552839	0.844141	1.60918	1.73142	0	0	0	0.00473205	0.407788	2.04835	0.125905	5.30101	0	0	0	0	12.6624	2.87781
Brussels-2	0.310482	0.0669736	0.175313	0.152438	0.0516049	1.16617	2.05692	0	0	0	0	0.00556208	0.386696	1.73777	0.156642	5.24244	0	0	0.315075	0	11.8241	2.68729
Stockholm	0.574067	0.0422532	0.150576	0	0.0203084	0.694072	0.992995	4.17577	0	0	0	0.00136913	0.187489	0.677853	0.175847	4.06118	0	0	0	0	11.7538	2.67131
Paris	1.31125	0.0755404	0.150576	0.189284	0.0301682	1.05049	0.616189	0	0	0	0	0.000821477	0.114837	0.549677	0	3.50472	0	0	0.704493	0	8.29804	1.88592
Prague	0.895254	0.0526713	0.844515	0.048637	0.00956554	0.569014	0.718148	3.36099	0	0	0	0	0	0.0936669	0	0.771233	0	0	0	0	7.36369	1.67357
Sofia	2.15639	0	0	0	0	0.337656	0	3.46284	0	0	0	0.000226762	0	0.059158	0	0	0	0	0	0	6.01627	1.36733
Oslo-2	0.687264	0.0202554	0.261787	0	0.00505257	0.234484	0.359074	3.05544	0	0	0	0	0	0.0887371	0	0.55646	0	0	0	0	5.26856	1.1974
Amsterdam	0.0675621	0.0332871	0.232962	0.0981162	0.0147653	0.731589	3.38239	0	0	0	0	0.00259706	0.0585903	0.224308	0	0.312398	0	0	0	0	5.15856	1.1724
Zurich	0.0760356	0	0.0483994	0.0458999	0.0110372	0.262622	0.545261	0	0	0	0	0.00234891	0.154678	0.741941	0	2.94826	0	0	0.184089	0	5.02057	1.14104
Birmingham	0.453206	0.010164	0.0574339	0	0.00740716	0.256369	0.36794	2.85175	0	0.720935	0	0.000389346	0	0.15529	0	0	0	0	0	0	4.88088	1.10929
Riga-1	0.240947	0.0528528	0	0	0.00745622	0.606531	0	3.81931	0	0	0	0.000179698	0	0	0	0	0	0	0	0	4.72727	1.07438
Trondheim	0.160157	0.0438504	0.061521	0	0	0.165702	0.310311	3.46284	0	0	0	0	0	0.0961318	0	0	0	0	0.251352	0	4.55186	1.03451
Oslo-1	0.433267	0.0607663	0.201341	0	0.0114786	0.515864	0.41227	2.49528	0	0	0	0	0.0749955	0.162685	0.178992	0	0	0	0	0	4.54694	1.0334
Madrid	1.6016	0.0480975	0.171656	0	0.00936932	0.631543	0.775777	0	0	0	0	0.000453524	0	0.120781	0	0.907908	0	0	0	0	4.26718	0.969815
Turin-2	0.250649	0.0035937	0.0273187	0.0208444	0.00470919	0	0.292579	0	0	0	0.857135	0.000658893	0.042185	0.138035	0	2.41132	0	0	0	0	4.04903	0.920235
Belgrade	0.140412	0	0.240061	0.0286348	0.00721095	0	0.239383	0	0	0	0	0.000577601	0	0.209518	0	2.67491	0	0	0.265513	0	3.80622	0.86505
Asker	0.327235	0.0469722	0	0	0	0.472094	0.642787	0	0	0	0	0	0	0.0788774	0	2.17703	0	0	0	0	3.74499	0.851134
Marseille	1.00988	0	0	0	0.0117566	0.264706	0.301445	0	0	0	0	0.000179698	0.042185	0.211161	0	1.43833	0	0	0.395319	0	3.67497	0.835219
Warsaw	0.0702626	0.0235224	0.137024	0.194338	0.0176595	1.14428	1.24124	0	0	0	0	0.00139052	0	0.391922	0	0	0	0	0	0	3.22164	0.732191
Tromsø	0.168064	0.0552486	0	0	0	0.168828	0.208352	0	0	0	0	0	0	0.0492984	0	1.94273	0	0	0.361097	0	2.95362	0.671276
Copenhagen	0	0.051546	0	0	0.00622986	0	0.585158	0	0	0	0	0	0	0.0838072	0	1.47413	0	0	0.272593	0	2.47346	0.562151
Turin-1	0.124403	0.0033033	0.0077439	0	0	0	0	0	0	0	1.20842	0	0	0.0887371	0	0.43931	0	0	0	0	1.87192	0.425436
Frankfurt	0.422061	0	0.0602303	0	0.00652419	0.18446	0.536394	0	0	0	0	0.000954111	0.0632775	0.303185	0	0	0	0	0	0	1.57709	0.358429
Nuuk-1	0.166981	0	0.0402252	0	0.00534689	0.231357	0.421136	0	0	0	0	0.000188255	0.0374978	0.258816	0	0.390498	0	0	0	0	1.55205	0.352738
Helsinki	0.620963	0	0.165633	0.0513742	0.00603365	0.353289	0.341342	0	0	0	0	0	0	0	0	0	0	0	0	0	1.53863	0.34969
Bremen	0.443083	0	0.0101101	0	0.00485635	0	0	0	0	0	0	0.000654614	0.0445286	0.14543	0	0.205011	0	0	0.336316	0	1.18999	0.270452
Vienna	0.593472	0.002904	0.01979	0	0	0.143817	0	0	0	0	0	0	0	0.0517633	0	0	0	0	0	0	0.811746	0.184488
Riga-2	0.156357	0	0	0	0	0	0	0	0	0	0	0	0	0	0	0	0	0	0	0	0.156357	0.0355356
Nuuk-2	0	0	0.0124763	0	0	0.090667	0	0	0	0	0	0	0	0.0369738	0	0	0	0	0	0	0.140117	0.0318448
